# Supplementary material for: A ‘whole of United Nations approach’ to tackle antimicrobial resistance? A mapping of the mandate and activities of international organisations
Source: PubMed Central journal article supplement — BMJ Glob Health. 2022 May 24;7(5):e008181. doi: 10.1136/bmjgh-2021-008181 (PMC9134163; doi:10.1136/bmjgh-2021-008181), 2022-05-24
Supplement: bmjgh-2021-008181supp001.pdf [file bmjgh-2021-008181supp001.pdf]

Didier Wernli, Stephan Harbarth, Nicolas Levrat, Didier Pittet

## A whole of United Nations' approach to tackle antimicrobial resistance? A mapping of the mandate and activities of international organisations

Supplementary material

### Supplementary material 1 – Examples of other core, involved and related organizations regarding antimicrobial resistance

| N  | Acronym        | Primary mandate            | AMR specific activities | AMR sensitive activities | Mandate in relation to AMR | Type of organization | Summary of current role in the governance of AMR covering both AMR sensitive and AMR specific activities                                                                                                                                                                                                 |
|----|----------------|----------------------------|-------------------------|--------------------------|----------------------------|----------------------|----------------------------------------------------------------------------------------------------------------------------------------------------------------------------------------------------------------------------------------------------------------------------------------------------------|
| 2  | GARDP          | Health                     | Yes                     | Yes                      | Core                       | Independent          | The Global Antibiotic Research and Development Partnership is developing new treatments for drug-resistant infections that pose the greatest threat to health. GARDP is working with partners to ensure sustainable access to treatments and promoting responsible use and affordability to all in need. |
| 3  | BMGF           | Health funding             | Yes                     | Yes                      | Involved                   | Independent          | The Bill and Melinda Gates Foundation plays a major role in funding global health issues. They have also funded the creation of the Global Partnership Against Antibiotic Resistance.                                                                                                                    |
| 4  | GAVI           | Health                     | No                      | Yes                      | Involved                   | Independent          | Given the important of infection prevention to reduce antimicrobial use, activities of GAVI regarding the provision of vaccines in LMIC make the organization central to tackle AMR.                                                                                                                     |
| 5  | GFATM          | Health                     | Yes                     | Yes                      | Involved                   | Independent          | The Global Fund to Fight AIDS, Tuberculosis and Malaria is central to the global governance of AMR given the important of AMR in HIV-AIDS, malaria, and tuberculosis.                                                                                                                                    |
| 6  | MPP            | Human health               | Yes                     | Yes                      | Involved                   | Independent          | The Medicine Patent Pool, as an organization working to increase access to HIV, hepatitis C and TB treatment in LMIC, is working on drug resistance through the improvement of stewardship.                                                                                                              |
| 7  | MSF            | Humanitarian               | No                      | Yes                      | Involved                   | Independent          | Doctor Without Borders (Médecins sans Frontières) has been involved in the fight against AMR for several years, mainly in countries in conflicts.                                                                                                                                                        |
| 8  | UNITAID        | Health innovation          | Yes                     | Yes                      | Involved                   | Independent          | Unitaid, which is actively involved to ensure equitable access to innovative diagnostic and therapeutic treatments, devotes half of its investments to the fight against AMR.                                                                                                                            |
| 9  | Wellcome Trust | Health Funding             | Yes                     | Yes                      | Involved                   | Independent          | The Wellcome Trust has been collaborating with the private sector and philanthropic partners to develop the AMR Action Fund.                                                                                                                                                                             |
| 13 | WEF            | Public-private cooperation | No                      | Yes                      | Involved                   | Independent          | The World Economic Forum has already included AMR in its Global Health Risks report and can use its forums to call for public and private cooperation to develop innovative solutions to AMR.                                                                                                            |
| 11 | ISO            | International Standards    | No                      | Yes                      | Related                    | Independent          | The International Organization for Standardization works with organizations and experts to share knowledge and develop voluntary and consensus-based market relevant international standards that support innovation and provide solutions to global challenges.                                         |
| 16 | ICRC           | Humanitarian               | No                      | Yes                      | Related                    | Independent          | The International Committee of the Red Cross is confronted with AMR through its works in conflicted areas.                                                                                                                                                                                               |

Abbreviations used in the table: AMR: Antimicrobial Resistance, HIV/AIDS: Human immunodeficiency virus infection and acquired immunodeficiency syndrome, LMIC: Low- and Middle-Income Countries, TB: Tuberculosis, UN: United Nations.

Didier Wernli, Stephan Harbarth, Nicolas Levrat, Didier Pittet

**Supplementary material 2 – Other organs and relevant subdivisions of the United Nations System and their role in the global governance of AMR.**

| <i>N</i> | <i>Acronym</i>                         | <i>Primary mandate</i>  | <i>AMR specific activities</i> | <i>AMR sensitive activities</i> | <i>Mandate in relation to AMR</i> | <i>Type of organization</i>     | <i>Summary of current role in the global governance of AMR covering both AMR sensitive and AMR specific activities</i>                                                                                                                                                           |
|----------|----------------------------------------|-------------------------|--------------------------------|---------------------------------|-----------------------------------|---------------------------------|----------------------------------------------------------------------------------------------------------------------------------------------------------------------------------------------------------------------------------------------------------------------------------|
| 01       | CSTD                                   | Development             | No                             | Yes                             | Related                           | Functional commissions (ECOSOC) | The Commission on Science and Technology for Development has AMR sensitive activities related to innovation.                                                                                                                                                                     |
| 02       | UNFF                                   | Forests                 | No                             | No                              | Related                           | Functional commissions (ECOSOC) | The United Nations Forum on Forests promotes the management, conservation, and sustainable development of all types of forests and strengthen long term political commitment.                                                                                                    |
| 03       | CND                                    | International drugs     | No                             | No                              | Relevant                          | Functional Commissions (ECOSOC) | The Commission on Narcotic Drugs is the governing body of the UNODC. It analyses the global drug situation, considering supply and demand reduction. It acts through resolutions and decisions.                                                                                  |
| 04       | CSW                                    | Women                   | No                             | No                              | Relevant                          | Functional commissions (ECOSOC) | The Commission on Status of Women is the principal global intergovernmental body exclusively dedicated to the promotion of gender equality and the empowerment of women.                                                                                                         |
| 05       | SOCHUM                                 | Social and humanitarian | No                             | No                              | Relevant                          | Subsidiary Organs (UNGA)        | The Social, Humanitarian and Cultural Issues (Third Committee) has a mandate on human rights, humanitarian affairs and social matters.                                                                                                                                           |
| 06       | UN water                               | Water                   | No                             | No                              | Relevant                          | Other                           | Un-Water is a coordination mechanism to support UN Member States to sustainably manage water and sanitation. Un-Water has a health section dedicated to WASH.                                                                                                                    |
| 07       | UN-IASC                                | Humanitarian            | No                             | No                              | Relevant                          | Other                           | The United Nations Inter-Agency Standing Committee oversees the coordination of global humanitarian assistance issues.                                                                                                                                                           |
| 08       | UNCLOS                                 | Environment             | No                             | No                              | Relevant                          | Secretariats of Conventions     | The United Nations Convention on the Law of the Sea acts in the protection of the marine environment, the fight against marine pollution and the fight against the degradation and depletion of fish stocks.                                                                     |
| 09       | UNFCCC                                 | Environment             | No                             | No                              | Relevant                          | Secretariats of Conventions     | The United Nations Framework Convention on Climate Change has a mandate to prevent dangerous human interference with the climate system.                                                                                                                                         |
| 10       | UNIATF                                 | Health                  | No                             | No                              | Relevant                          | Other                           | The United Nations Interagency Task Force on Non-Communicable Diseases focuses on people living with NCDs is relevant to AMR as those people are more likely to suffer from the impact of AMR.                                                                                   |
| 11       | UNPFII                                 | Indigenous issues       | No                             | No                              | Relevant                          | Other Bodies (ECOSOC)           | The United Nations Permanent Forum on Indigenous Issues is a high-level advisory body to the Economic and Social Council. UNPFII's mandate is to address indigenous issues related to economic and social development, culture, environment, education, health and human rights. |
| 12       | UNSDN                                  | Social development      | No                             | No                              | Relevant                          | Functional commissions (ECOSOC) | The United Nations Social Development Network provides a global platform for sharing knowledge, experiences and best practices in social development from around the world.                                                                                                      |
| 13       | Administrative and Budgetary Committee | Administrative          | No                             | No                              | Distant                           | Subsidiary Organs (UNGA)        | The General Assembly Committee is responsible for administrative and budgetary matters.                                                                                                                                                                                          |
| 14       | CCPCJ                                  | Security                | No                             | No                              | Distant                           | Functional commissions (ECOSOC) | The Commission on Crime Prevention and Criminal Justice acts as the principal policymaking body of the United Nations in the field of crime prevention and criminal justice.                                                                                                     |
| 15       | CDP                                    | Development             | No                             | No                              | Distant                           | Other bodies (ECOSOC)           | The Committee for Development Policy advises the Council on a wide range of issues that are relevant for the implementation of the 2030 Agenda for Sustainable Development                                                                                                       |
| 16       | CEPA                                   | Public Administration   | No                             | No                              | Distant                           | Other bodies (ECOSOC)           | The United Nations Committee of Experts on Public Administration supports the work of the United Nations Economic and Social Council by providing expert advice on issues related to governance and public administration structures.                                            |

Didier Wernli, Stephan Harbarth, Nicolas Levrat, Didier Pittet

|    |                                             |                                 |    |    |         |                                                  |                                                                                                                                                                                                                                                                                                                                               |
|----|---------------------------------------------|---------------------------------|----|----|---------|--------------------------------------------------|-----------------------------------------------------------------------------------------------------------------------------------------------------------------------------------------------------------------------------------------------------------------------------------------------------------------------------------------------|
| 17 | Committee on Non-Governmental Organizations | Administration                  | No | No | Distant | Other bodies (ECOSOC)                            | The Committee on Non-Governmental Organizations considers various applications and quadrennial reports submitted by NGOs.                                                                                                                                                                                                                     |
| 18 | CRPD                                        | People with disabilities        | No | No | Distant | Treaty based                                     | The Committee on the Rights of Persons with Disabilities promotes, protects and ensures the full and equal enjoyment of all human rights and fundamental freedoms by all persons with disabilities, and to promote respect for their inherent dignity.                                                                                        |
| 19 | CTC                                         | Security                        | No | No | Distant | Subsidiary Organs (Security Council)             | The United Nations Security Council Counter-Terrorism Committee was established to monitor the implementation of Resolution 1373, which, among other provisions, obliges all States to criminalise aiding terrorist activities. Its ultimate goal is to enhance the capacity of States to combat terrorism.                                   |
| 20 | DISEC                                       | Security                        | No | No | Distant | Subsidiary Organs (UNGA)                         | The Disarmament and International Security Committee deals with disarmament, global challenges and threats to peace that affect the international community and seeks out solutions to the challenges in the international security regime.                                                                                                   |
| 21 | ECA                                         | Economic and Social Development | No | No | Distant | Regional Commissions (ECOSOC + Security Council) | The Economic Commission for Africa is one of the UN's five regional commissions. It has a mandate in promoting the economic and social development of its member States, fostering intra-regional integration, and promoting international cooperation for Africa's development.                                                              |
| 22 | ECLAC                                       | Economic and Social Development | No | No | Distant | Regional Commissions (ECOSOC + Security Council) | The Economic Commission for Latin America and the Caribbean is one of the UN's five regional commissions. It has a mandate in contributing to the economic development of Latin America and the Caribbean, coordinating actions directed towards this end, and reinforcing economic ties among countries and with other nations of the world. |
| 23 | ECOFIN                                      | Economics                       | No | No | Distant | Subsidiary Organs (UNGA)                         | The Economic and Financial Committee (Second Committee) deals with issues relating to economic growth and development. It also considers issues relating to groups of countries in special situations.                                                                                                                                        |
| 24 | ESCAP                                       | Economic and Social Development | No | No | Distant | Regional Commissions (ECOSOC + Security Council) | The Economic and Social Commission for Asia and the Pacific is one of the UN's five regional commissions. ESCAP serves as the United Nations' regional hub promoting cooperation among countries to achieve inclusive and sustainable development.                                                                                            |
| 25 | ESCWA                                       | Development                     | No | No | Distant | Other Bodies (ECOSOC)                            | The Economic and Social Commission for Western Asia is one of the UN's five regional commissions. Its purpose was to stimulate economic activity in member countries, strengthen cooperation between them promote development.                                                                                                                |
| 26 | ICSC                                        | Employment condition            | No | No | Distant | Independent                                      | The International Civil Service Commission works strengthening and maintaining high standards in the international civil service.                                                                                                                                                                                                             |
| 27 | International Law Commission                | Legal                           | No | No | Distant | Subsidiary Organs (UNGA)                         | The International Law Commission is responsible for the codification and progressive development of international law.                                                                                                                                                                                                                        |
| 28 | IRMCT                                       | Security                        | No | No | Distant | Subsidiary Organs (Security Council)             | The International Residual Mechanism for Criminal Tribunal is mandated to perform essential functions previously carried out by the ICTR and the ICTY.                                                                                                                                                                                        |
| 29 | Legal committee                             | Legal                           | No | No | Distant | Subsidiary Organs (UNGA)                         | The Legal Committee is the Sixth Committee of the UNGA. It is the primary forum for the consideration of legal questions in the General Assembly.                                                                                                                                                                                             |
| 30 | MSC                                         | Security                        | No | No | Distant | Subsidiary Organs (Security Council)             | The Military Staff Committee is mandated to plan UN military operations and assist in the regulation of armaments.                                                                                                                                                                                                                            |
| 31 | Non-Proliferation Committee                 | Security                        | No | No | Distant | Subsidiary Organs (Security Council)             | The Non-Proliferation Committee facilitates the provision of technical assistance and enhances cooperation with relevant international organisations.                                                                                                                                                                                         |

Didier Wernli, Stephan Harbarth, Nicolas Levrat, Didier Pittet

|    |                                               |                                 |    |    |         |                                                  |                                                                                                                                                                                                                                      |
|----|-----------------------------------------------|---------------------------------|----|----|---------|--------------------------------------------------|--------------------------------------------------------------------------------------------------------------------------------------------------------------------------------------------------------------------------------------|
| 32 | Peacekeeping operation and political missions | Security                        | No | No | Distant | Subsidiary Organs (Security Council)             | The Peacekeeping operation and political missions is in charge of the planning, management, deployment, and support of UN peacekeeping operations.                                                                                   |
| 33 | Sanctions committees (ad hoc)                 | Security                        | No | No | Distant | Subsidiary Organs (Security Council)             | The mandate of Sanctions Committees is to pressure a state or entity to comply with the objectives set by the Security Council without resorting to force.                                                                           |
| 34 | SPECPOL                                       | Political and decolonisation    | No | No | Distant | Subsidiary Organs (UNGA)                         | The Special Political and Decolonization Committee has a mandate on diverse set of political issues, including UN peacekeeping and peaceful uses of outer space.                                                                     |
| 35 | The Commission on Population and Development  | Population and development      | No | No | Distant | Functional commissions (ECOSOC)                  | The goal of the Commission on Population and Development is the follow-up to the implementation of the Programme of Action of the International Conference on Population and Development.                                            |
| 36 | UNDC                                          | Security                        | No | No | Distant | Subsidiary Organs (UNGA)                         | The United Nations Disarmament Commission prepares proposals for a treaty for the regulation, limitation and balanced reduction of all armed forces and all armaments, including the elimination of all weapons of mass destruction. |
| 37 | UNECE                                         | Economic and Social Development | No | No | Distant | Regional Commissions (ECOSOC + Security Council) | The United Nations Economic Commission for Europe is one of the UN's five regional commissions. Its major aim is the promotion of the pan-European economic integration.                                                             |
| 38 | UNSD                                          | Statistics                      | No | No | Distant | Functional commissions (ECOSOC)                  | The United Nations Statistics Division coordinates information-gathering efforts between agencies.                                                                                                                                   |

Abbreviations used in the table: AMR: Antimicrobial Resistance, ECOSOC: United Nations Economic and Social Council, ICTR: International Criminal Tribunal for Rwanda, ICTY: International Tribunal for the former Yugoslavia, NCD: Non-Communicable Diseases, NGO: Non-Governmental Organizations, UN: United Nations, UNGA: United Nations General Assembly, UNODC: United Nations Office on Drugs and Crime, WASH: Water, Sanitation and Hygiene.

Didier Wernli, Stephan Harbarth, Nicolas Levrat, Didier Pittet

### Supplementary material 3 – List of documents reviewed for the analysis

1. Committee on Economic, Social and Cultural Rights. 2000. The Right to the Highest Attainable Standard of Health (Art.12). CESCR General Comment No. 14.
2. Codex Alimentarius Commission. 1993. RECOMMENDED INTERNATIONAL CODE OF PRACTICE FOR CONTROL OF THE USE OF VETERINARY DRUGS. CAC/RCP 38-1993
3. Codex Alimentarius Commission. 2000. REPORT ON OIE ACTIVITIES, INCLUDING THE HARMONIZATION OF TECHNICAL REQUIREMENTS FOR REGISTRATION OF VETERINARY MEDICINAL PRODUCTS (VICH)
4. Codex Alimentarius Commission. 2001. REPORT OF THE TWELFTH SESSION OF THE CODEX COMMITTEE ON RESIDUES OF VETERINARY DRUGS IN FOODS Washington, D.C., 28 - 31 March 2000
5. Codex Alimentarius Commission. 2005. CODE OF PRACTICE TO MINIMIZE AND CONTAIN ANTIMICROBIAL RESISTANCE CAC/RCP 61-2005
6. Codex Alimentarius Commission. 2007. AD HOC CODEX INTERGOVERNMENTAL TASK FORCE ON ANTIMICROBIAL RESISTANCE. Provisional Agenda. First Session Seoul, Republic of Korea, 23-26 October 2007
7. Codex Alimentarius Commission. 2007. REPORT OF THE 1st SESSION OF THE CODEX AD HOC INTERGOVERNMENTAL TASK FORCE ON ANTIMICROBIAL RESISTANCE Seoul, Republic of Korea 23-26 October 2007
8. Codex Alimentarius Commission. 2008. AD HOC CODEX INTERGOVERNMENTAL TASK FORCE ON ANTIMICROBIAL RESISTANCE. Provisional Agenda. Second Session Seoul, Republic of Korea, 20-24 October 2008
9. Codex Alimentarius Commission. 2008. REPORT OF THE SECOND SESSION OF THE CODEX AD HOC INTERGOVERNMENTAL TASK FORCE ON ANTIMICROBIAL RESISTANCE Seoul, Republic of Korea 20-24 October 2008
10. Codex. 2009. GUIDELINES FOR THE DESIGN AND IMPLEMENTATION OF NATIONAL REGULATORY FOOD SAFETY ASSURANCE PROGRAMME ASSOCIATED WITH THE USE OF VETERINARY DRUGS IN FOOD PRODUCING ANIMALS. CAC/GL 71-2009.
11. Codex Alimentarius Commission. 2009. AD HOC CODEX INTERGOVERNMENTAL TASK FORCE ON ANTIMICROBIAL RESISTANCE. Provisional Agenda. Third Session Jeju, Republic of Korea, 12-16 October 2009
12. Codex Alimentarius Commission. 2009. REPORT OF THE THIRD SESSION OF THE CODEX AD HOC INTERGOVERNMENTAL TASK FORCE ON ANTIMICROBIAL RESISTANCE. Jeju, Republic of Korea 12-16 October 2009
13. Codex Alimentarius Commission. 2010. JOINT FAO/WHO FOOD STANDARDS PROGRAMME AD HOC CODEX INTERGOVERNMENTAL TASK FORCE ON ANTIMICROBIAL RESISTANCE. Provisional Agenda. Fourth Session Jeju, Republic of Korea, 18-22 October 2010
14. Codex Alimentarius Commission. 2010. REPORT OF THE THIRD SESSION OF THE CODEX AD HOC INTERGOVERNMENTAL TASK FORCE ON ANTIMICROBIAL RESISTANCE. Jeju, Republic of Korea 12-16 October 2009
15. Codex Alimentarius Commission. 2011. GUIDELINES FOR RISK ANALYSIS OF FOODBORNE ANTIMICROBIAL RESISTANCE CAC/GL 77- 2011
16. Codex Alimentarius Commission. 2017. MATTERS ARISING FROM THE REPORTS OF THE COMMISSION, THE EXECUTIVE COMMITTEE AND THE SUBSIDIARY BODIES REPORT OF THE PHYSICAL WORKING GROUP ON ANTIMICROBIAL RESISTANCE London, United Kingdom 29 November – 2 December 2016
17. Codex Alimentarius Commission 2017. PROPOSED DRAFT REVISION OF THE CODE OF PRACTICE TO MINIMIZE AND CONTAIN ANTIMICROBIAL RESISTANCE (CAC/RCP 61-2005)
18. Codex Alimentarius Commission 2017. Report of the Electronic Working Group (EWG) on the Revision of the Code of Practice to Minimize and Contain Antimicrobial Resistance (CAC/RCP 61-2005)
19. Codex Alimentarius Commission. 2017. HOC CODEX INTERGOVERNMENTAL TASK FORCE ON ANTIMICROBIAL RESISTANCE Fifth Session Jeju, Republic of Korea, 27 November – 1 December 2017 PROVISIONAL AGENDA
20. CODEX. 2017. MATTERS REFERRED BY THE CODEX ALIMENTARIUS COMMISSION AND OTHER SUBSIDIARY BODIES. JOINT FAO/WHO FOOD STANDARDS PROGRAMME AD HOC CODEX INTERGOVERNMENTAL TASK FORCE ON ANTIMICROBIAL RESISTANCE. Fifth Session.
21. CODEX. 2017. PROGRESS REPORT OF THE REQUEST FOR SCIENTIFIC ADVICE ON FOODBORNE AMR FROM FAO AND WHO, IN COLLABORATION WITH OIE Prepared by FAO, WHO and OIE. JOINT FAO/WHO FOOD STANDARDS PROGRAMME AD HOC CODEX INTERGOVERNMENTAL TASK FORCE ON ANTIMICROBIAL RESISTANCE. Fifth Session.
22. Codex Alimentarius Commission. 2017. REPORT OF THE FIFTH SESSION OF THE CODEX AD HOC INTERGOVERNMENTAL TASK FORCE ON ANTIMICROBIAL RESISTANCE Jeju, Republic of Korea 27 November – 1 December 2017
23. Codex Alimentarius Commission. 2017. INFORMATION ON THE WORK OF OTHER RELEVANT INTERNATIONAL ACTIVITIES ON ANTIMICROBIAL RESISTANCE (Information of FAO and WHO). CX/AMR 17/5/4

Didier Wernli, Stephan Harbarth, Nicolas Levrat, Didier Pittet

24. CODEX. 2017. PROPOSED DRAFT REVISION OF THE CODE OF PRACTICE TO MINIMIZE AND CONTAIN ANTIMICROBIAL RESISTANCE (CAC/RCP 61-2005). Report of the Electronic Working Group (EWG) on the Revision of the Code of Practice to Minimize and Contain Antimicrobial Resistance (CAC/RCP 61-2005). JOINT FAO/WHO FOOD STANDARDS PROGRAMME AD HOC CODEX INTERGOVERNMENTAL TASK FORCE ON ANTIMICROBIAL RESISTANCE. Fifth Session.
25. CODEX. 2017. PROPOSED DRAFT REVISION OF THE CODE OF PRACTICE TO MINIMIZE AND CONTAIN ANTIMICROBIAL RESISTANCE (CXC 61-2005) Comments at Step 3 (Replies to CL 2017/83-AMR). JOINT FAO/WHO FOOD STANDARDS PROGRAMME AD HOC CODEX INTERGOVERNMENTAL TASK FORCE ON ANTIMICROBIAL RESISTANCE. Fifth Session.
26. CODEX. 2017. PROPOSED DRAFT GUIDELINES ON INTEGRATED SURVEILLANCE OF ANTIMICROBIAL RESISTANCE. Report of the electronic working group for the drafting of the Guidelines on integrated monitoring and surveillance of Antimicrobial Resistance. JOINT FAO/WHO FOOD STANDARDS PROGRAMME AD HOC CODEX INTERGOVERNMENTAL TASK FORCE ON ANTIMICROBIAL RESISTANCE. Fifth Session.
27. CODEX. 2017. PROPOSED DRAFT GUIDELINES ON INTEGRATED SURVEILLANCE OF ANTIMICROBIAL RESISTANCE Comments at Step 3 (Replies to CL 2017/82-AMR). JOINT FAO/WHO FOOD STANDARDS PROGRAMME AD HOC CODEX INTERGOVERNMENTAL TASK FORCE ON ANTIMICROBIAL RESISTANCE. Fifth Session.
28. Codex Alimentarius Commission. 2018. INFORMATION ON ACTIVITIES OF THE WORLD ORGANISATION FOR ANIMAL HEALTH (OIE) 41st Session FAO Headquarters, Rome, Italy, 2 - 6 July 2018
29. Codex. 2018. MAXIMUM RESIDUE LIMITS (MRLs) AND RISK MANAGEMENT RECOMMENDATIONS (RMRs) FOR RESIDUES OF VETERINARY DRUGS IN FOODS CX/MRL 2-2018.
30. Codex Alimentarius Commission. 2018. AD HOC CODEX INTERGOVERNMENTAL TASK FORCE ON ANTIMICROBIAL RESISTANCE Sixth Session Busan, Republic of Korea, 10-14 December 2018 PROVISIONAL AGENDA
31. Codex Alimentarius Commission. 2018. REPORT OF THE FIFTH SESSION OF THE CODEX AD HOC INTERGOVERNMENTAL TASK FORCE ON ANTIMICROBIAL RESISTANCE Jeju, Republic of Korea 27 November – 1 December 2017
32. Codex Alimentarius Commission. 2019. AD HOC CODEX INTERGOVERNMENTAL TASK FORCE ON ANTIMICROBIAL RESISTANCE Seventh Session Pyeongchang, Republic of Korea, 9-13 December 2019 PROVISIONAL AGENDA
33. Codex Alimentarius Commission. 2019. REPORT OF THE SEVENTH SESSION OF THE CODEX AD HOC INTERGOVERNMENTAL TASK FORCE ON ANTIMICROBIAL RESISTANCE Pyeongchang, Republic of Korea 9 – 13 December 2019
34. Codex Alimentarius Commission. 2021. JOINT FAO/WHO FOOD STANDARDS PROGRAMME AD HOC CODEX INTERGOVERNMENTAL TASK FORCE ON ANTIMICROBIAL RESISTANCE Eighth Session PROVISIONAL AGENDA
35. Codex Alimentarius Commission. 2021. REPORT OF THE EIGHTH SESSION OF THE CODEX AD HOC INTERGOVERNMENTAL TASK FORCE ON ANTIMICROBIAL RESISTANCE Virtual 4-9, 13 and 16 October 2021.
36. FAO OIE WHO UNEP. 2021. ANTIMICROBIAL RESISTANCE AND THE UNITED NATIONS SUSTAINABLE DEVELOPMENT COOPERATION FRAMEWORK Guidance for United Nations country team.
37. FAO OIE WHO. 2003. FAO/OIE/WHO Expert Workshop on Non-Human Antimicrobial Usage and Antimicrobial Resistance: Scientific assessment Geneva, December 1 – 5, 2003
38. FAO OIE WHO. 2004. Second Joint FAO/ OIE/WHO Expert Workshop on Non-Human Antimicrobial Usage and Antimicrobial Resistance: Management options 15–18 March 2004 Oslo, Norway
39. WHO. 2006. Antimicrobial Use in Aquaculture and Antimicrobial Resistance Report of a Joint FAO/OIE/WHO Expert Consultation on Antimicrobial Use in Aquaculture and Antimicrobial Resistance Seoul, Republic of Korea, 13–16 June 2006.
40. FAO OIE WHO. 2007. FAO/WHO/OIE Expert Meeting on Critically Important Antimicrobials Report of the FAO/WHO/OIE Expert meeting FAO, Rome, Italy 26–30 November 2007
41. FAO OIE WHO. 2010. The FAO-OIE-WHO Collaboration : Sharing responsibilities and coordinating global activities to address health risks at the animal-human-ecosystems interfaces A Tripartite Concept Note.
42. FAO OIE WHO. 2016. Antimicrobial Resistance A MANUAL FOR DEVELOPING NATIONAL ACTION PLANS. Version 1 February 2016.
43. FAO OIE WHO. 2016. CAMPAIGN TOOLKIT. WORLD ANTIBIOTIC AWARENESS WEEK 14 -20 NOVEMBER 2016.
44. FAO OIE WHO. 2016. National Action Plan development support tools. Sample Checklist (Appendix D).
45. FAO OIE WHO. 2017. Global Framework for Development & Stewardship to Combat Antimicrobial Resistance Draft Roadmap - WHO/EMP/IAU/2017.08. Revised 19th October 2017.
46. FAO OIE WHO. 2017. Global Framework for Development & Stewardship to Combat Antimicrobial Resistance Draft Roadmap WHO/EMP/IAU/2017.08. 12 May 2017
47. FAO OIE WHO. 2017. The Tripartite's Commitment Providing multi-sectoral, collaborative leadership in addressing health challenges. October 2017.

Didier Wernli, Stephan Harbarth, Nicolas Levrat, Didier Pittet

48. FAO OIE WHO. 2021. International instruments on the use of antimicrobials across the human, animal and plant sectors.
49. FAO. 1997. RISK MANAGEMENT AND FOOD SAFETY. Report of a Joint FAO/WHO Consultation. Rome, Italy, 27 to 31 January 1997.
50. FAO. 2003. Responsible use of antibiotics in aquaculture. FAO FISHERIES TECHNICAL PAPER 469. Rome, Italy.
51. FAO. 2007. FAO BIOSECURITY TOOLKIT.
52. FAO. 2011. GUIDE TO GOOD DAIRY FARMING PRACTICE.
53. FAO. 2012. Improving biosecurity through prudent and responsible use of veterinary medicines in aquatic food production FAO FISHERIES AND AQUACULTURE TECHNICAL PAPER 547.
54. FAO. 2013. FAO and Tripartite Antimicrobial Resistance Activities. Presentation by Patrick Otto. EU Commission Joint Conference on Antimicrobial Resistance. Brussels (Belgium). 11 December 2013.
55. FAO. 2015. Antimicrobial Resistance. Resolution 4/2015.
56. FAO. 2015. Status Report on Antimicrobial Resistance C 2015/28. Thirty-ninth Session. Rome, 6-13 June 2015.
57. FAO. 2016. DRIVERS, DYNAMICS AND EPIDEMIOLOGY OF ANTIMICROBIAL RESISTANCE IN ANIMAL PRODUCTION.
58. FAO. 2016. THE FAO ACTION PLAN ON ANTIMICROBIAL RESISTANCE 2016-2020.
59. FAO. 2017. ANTIMICROBIAL RESISTANCE (AMR) IN AQUACULTURE. COMMITTEE ON FISHERIES SUB-COMMITTEE ON AQUACULTURE. Ninth Session. Rome, 24–27 October 2017.
60. FAO. 2017. ANTIMICROBIAL RESISTANCE IN FOOD AND AGRICULTURE. Information sheets. 4 April 2017.
61. FAO. 2017. FAO strategy and initiatives in Antimicrobial resistance. Presentation by Juan Lubroth. United Kingdom – Russian Federation. February 2017
62. FAO. 2019. Aquaculture development. 8. Recommendations for prudent and responsible use of veterinary medicines in aquaculture. FAO Technical Guidelines for Responsible Fisheries. No. 5.
63. Magnusson, U., Sternberg, S., Eklund, G., Rozstalnyy, A. 2019. Prudent and efficient use of antimicrobials in pigs and poultry. FAO Animal Production and Health Manual 23. FAO. Rome.
64. FAO. 2020. METHODOLOGY TO ANALYSE AMR-RELEVANT LEGISLATION IN THE FOOD AND AGRICULTURE SECTOR. GUIDANCE DOCUMENT FOR REGULATORS. DRAFT FOR PUBLIC REVIEW.
65. FAO and WHO. 2019. Joint FAO/WHO Expert Meeting in collaboration with OIE on Foodborne Antimicrobial Resistance: Role of the Environment, Crops and Biocides MEETING REPORT MICROBIOLOGICAL RISK ASSESSMENT SERIES 34.
66. Global Leaders Group on Antimicrobial Resistance 2021. ANTIMICROBIAL RESISTANCE AND THE CLIMATE CRISIS Information note of the Global Leaders Group on Antimicrobial Resistance. October 2021.
67. Global Leaders Group on Antimicrobial Resistance. 2021. FINANCING TO ADDRESS ANTIMICROBIAL RESISTANCE Information note of the Global Leaders Group on Antimicrobial Resistance. July 2021.
68. Global Leaders Group on Antimicrobial Resistance. 2021. Codex Guidelines on integrated monitoring and surveillance of foodborne antimicrobial resistance and Code of Practice to minimize and contain foodborne antimicrobial resistance. Statement of the Global Leaders Group on Antimicrobial Resistance. October 2021.
69. Global Leaders Group on Antimicrobial Resistance. 2021. PRIORITIES OF THE GLOBAL LEADERS GROUP ON AMR (Rolling action plan). January 2022 version.
70. Global Leaders Group on Antimicrobial Resistance. 2021. Information note on the Global Leaders Group on Antimicrobial Resistance.
71. Global Leaders Group on Antimicrobial Resistance. 2021. Final report of the inaugural online meeting of the Global Leaders Group on Antimicrobial Resistance. January 26-27, 2021.
72. Global Leaders Group on Antimicrobial Resistance. 2021. Final report of the FIRST online meeting of the Global Leaders Group on Antimicrobial Resistance. May 4-5, 2021.
73. Global Leaders Group on Antimicrobial Resistance. 2021. Final Report of the Second Meeting of the Global Leaders Group on Antimicrobial Resistance 24 August, 2021.
74. Global Leaders Group on Antimicrobial Resistance. 2021. Report of the Third Meeting of the Global Leaders Group on Antimicrobial Resistance 10 November 2021.
75. Global Leaders Group on Antimicrobial Resistance. 2021. Antimicrobial Use in Food Systems. Statement of the Global Leaders Group on Antimicrobial Resistance. August 2021.
76. Global Leaders Group on Antimicrobial Resistance. 2021. SURVEILLANCE OF ANTIMICROBIAL RESISTANCE AND USE. Information note of the Global Leaders Group on Antimicrobial Resistance.
77. Global Leaders Group on Antimicrobial Resistance. 2021. FINAL TERMS OF REFERENCE FOR THE GLOBAL LEADERS GROUP ON ANTIMICROBIAL RESISTANCE.

Didier Wernli, Stephan Harbarth, Nicolas Levrat, Didier Pittet

78. Global Leaders Group on Antimicrobial Resistance. 2022. Reducing Antimicrobial Discharges from Food Systems, Manufacturing Facilities and Human Health Systems into the Environment. Call to Action by the Global Leaders Group on Antimicrobial Resistance. March 2022.
79. Human Rights Council. 2016. Access to medicines in the context of the right of everyone to the enjoyment of the highest attainable standard of physical and mental health. Resolution A/HRC/32/L.23/Rev.1.
80. Human Rights Council. 2017. The right of everyone to the enjoyment of the highest attainable standard of physical and mental health in the implementation of the 2030 Agenda for Sustainable Development. Resolution A/HRC/35/L.18/Rev.1.
81. Ad-hoc Interagency Coordination Group on Antimicrobial Resistance. 2017. AMR Framework for Action Supported by the IACG. Working Document. August 2017
82. Ad-hoc Interagency Coordination Group on Antimicrobial Resistance. 2017. Mapping sheets.
83. Ad-hoc Interagency Coordination Group on Antimicrobial Resistance. 2017. IACG MEMBERS.
84. Ad-hoc Interagency Coordination Group on Antimicrobial Resistance. 2017. AD HOC INTERAGENCY COORDINATION GROUP ON ANTIMICROBIAL RESISTANCE (IACG).
85. Ad-hoc Interagency Coordination Group on Antimicrobial Resistance. 2017. Work plan of the Ad-hoc Interagency Coordination Group on Antimicrobial Resistance May 2017 – September 2019.
86. Ad-hoc Interagency Coordination Group on Antimicrobial Resistance. 2017. Report of the First Meeting of the Interagency Coordination Group on Antimicrobial Resistance.
87. Ad-hoc Interagency Coordination Group on Antimicrobial Resistance. 2017. Report of the Second Meeting of the Interagency Coordination Group on Antimicrobial Resistance.
88. Ad-hoc Interagency Coordination Group on Antimicrobial Resistance. 2017. Report of the Third Meeting (via Teleconference) of the Interagency Coordination Group on Antimicrobial Resistance.
89. Ad-hoc Interagency Coordination Group on Antimicrobial Resistance. 2017. Call to Action on Antimicrobial Resistance. 12 and 13 October 2017 Berlin, Germany
90. Ad-hoc Interagency Coordination Group on Antimicrobial Resistance. 2017. ANNEX II: SUBGROUPS MEMBERSHIP.
91. Ad-hoc Interagency Coordination Group on Antimicrobial Resistance. 2017. Meeting Report: Fourth meeting of the Ad hoc Interagency Coordination Group on Antimicrobial Resistance (IACG).
92. Ad-hoc Interagency Coordination Group on Antimicrobial Resistance. 2017. Report of the fourth meeting of the Interagency Coordination Group on Antimicrobial Resistance. 16-17 October 2017.
93. Ad-hoc Interagency Coordination Group on Antimicrobial Resistance. 2017. IACG Activity Mapping Exercise.
94. Ad-hoc Interagency Coordination Group on Antimicrobial Resistance. 2018. Antimicrobial Resistance and the SDGs: challenges and opportunities Report of a briefing event by the UN Interagency Coordination Group (IACG) on Antimicrobial Resistance in conjunction with the 2018 Highlevel Political Forum on Sustainable Development.
95. Ad-hoc Interagency Coordination Group on Antimicrobial Resistance. 2018. AMR Indicators and their relevance to the global indicator framework for the SDGs and targets for the 2030 Agenda for Sustainable Development: Analytic support provided by McKinsey & Company, funded by the Wellcome Trust, to inform the United Nations Inter-Agency Coordination Group (IACG) on Antimicrobial Resistance.
96. Ad-hoc Interagency Coordination Group on Antimicrobial Resistance. 2018. Report of the sixth meeting of the Interagency Coordination Group on Antimicrobial Resistance (IACG). 29 January 2018.
97. Ad-hoc Interagency Coordination Group on Antimicrobial Resistance. 2018. Antimicrobial resistance: Invest in innovation and research, and boost R&D and access IACG discussion paper 1. June 2018.
98. Ad-hoc Interagency Coordination Group on Antimicrobial Resistance. 2018. Comments received on discussion papers informing the report of the UN Ad-hoc Interagency Coordination Group on AMR to the UN Secretary-General
99. Ad-hoc Interagency Coordination Group on Antimicrobial Resistance. 2018. Antimicrobial resistance: national action plans. IACG Discussion Paper 2. June 2018.
100. Ad-hoc Interagency Coordination Group on Antimicrobial Resistance. 2018. Surveillance and monitoring for antimicrobial use and resistance. IACG Discussion Paper 3. June 2018.
101. Ad-hoc Interagency Coordination Group on Antimicrobial Resistance. 2018. Future Global Governance for Antimicrobial Resistance IACG Discussion Paper 4. July 2018.
102. Ad-hoc Interagency Coordination Group on Antimicrobial Resistance. 2018. Reduce unintentional exposure and the need for antimicrobials, and optimize their use. IACG Discussion Paper 5. July 2018.
103. Ad-hoc Interagency Coordination Group on Antimicrobial Resistance. 2018. Meeting the Challenge of Antimicrobial Resistance: From Communication to Collective Action IACG Discussion Paper. July 2018.



Didier Wernli, Stephan Harbarth, Nicolas Levrat, Didier Pittet

104. Ad-hoc Interagency Coordination Group on Antimicrobial Resistance. 2018. Current status and next steps IACG Information Session for Member States and Missions. Presentation by Haileyesus Getahun. Geneva, 1 October, 2018.
105. Ad-hoc Interagency Coordination Group on Antimicrobial Resistance. 2018. 2nd Informal Consultation of Member States and relevant partners on the global framework for development and stewardship to combat antimicrobial resistance Executive Board Room, WHO Headquarters, Geneva, Switzerland 1-2 October 2018 Draft Agenda.
106. Ad-hoc Interagency Coordination Group on Antimicrobial Resistance. 2018. Report of an Information Session for Member States and Permanent Missions. 1 October 2018 12:30-14:00 World Health Organization (WHO) Headquarters Geneva, Switzerland.
107. Ad-hoc Interagency Coordination Group on Antimicrobial Resistance. 2019. DRAFT RECOMMENDATIONS OF THE AD HOC INTERAGENCY COORDINATION GROUP ON ANTIMICROBIAL RESISTANCE. January 2019.
108. Ad-hoc Interagency Coordination Group on Antimicrobial Resistance. 2019. NO TIME TO WAIT: SECURING THE FUTURE FROM DRUG-RESISTANT INFECTIONS REPORT TO THE SECRETARY-GENERAL OF THE UNITED NATIONS. APRIL 2019
109. INFOSAN. 2008. Antimicrobial Resistance Antimicrobial Resistance from Food Animals. INFOSAN Information Note No. 2/2008. 7 March 2008.
110. INFOSAN. 2009. Implementation of the WHO Global Strategy for Food Safety Implementation of the WHO Global Strategy for Food Safety. INFOSAN Information Note No. 3/2009. 6 May 2009.
111. INFOSAN. 2010. Biosecurity Biosecurity: An integrated approach to manage risk to human, animal and plant life and health. INFOSAN Information Note No. 1/2010. 3 March 2010.
112. INFOSAN. 2020. INFOSAN SECRETARIAT STRATEGIC PLAN 2020-2025.
113. OECD WHO OIE FAO. 2017. TACKLING ANTIMICROBIAL RESISTANCE ENSURING SUSTAINABLE R&D Final note prepared by OECD, WHO, FAO and OIE 29. June 2017.
114. OHCHR. 2015. Access to Medicines in the context of the Right to Health.
115. OIE and FAO. 2009. GUIDE TO GOOD FARMING PRACTICES FOR ANIMAL PRODUCTION FOOD SAFETY.
116. OIE WHO. 2015. Handbook for the assessment of capacities at the human-animal interface: Global capacities alert and response.
117. OIE. 2003. OIE International Standards on Antimicrobial Resistance, 2003 OIE Headquarters, Paris, 2 to 4 October 2001.
118. OIE. 2003. OIE Guidelines on Antimicrobial Resistance. RESOLUTION No. XXX.
119. OIE. 2006. List of Antimicrobials of Veterinary Importance. RESOLUTION No. XXXIII.
120. OIE. 2007. OIE LIST OF ANTIMICROBIALS OF VETERINARY IMPORTANCE.
121. OIE. 2007. List of Antimicrobials of Veterinary Importance. RESOLUTION No. XXVIII.
122. OIE. 2009. Veterinary products. RESOLUTION No. 25.
123. OIE. 2010. Aquatic Animal Health Surveillance. Presentation by Barry Hill. Workshop for OIE National Focal Points for Aquatic Animals. Dubrovnik (Croatia), 16-18 November 2010.
124. OIE. 2010. WORLD ORGANISATION FOR ANIMAL HEALTH (OIE) FIFTH STRATEGIC PLAN: 2011–2015 (78 SG/20).
125. OIE. 2013. OIE Global Conference on the Responsible and Prudent Use of Antimicrobial Agents for Animals: Codex standards and guidelines. Presentation by Verena Carolissen. Paris, France 13 March 2013.
126. OIE. 2013. Fact sheets on Antimicrobial resistance.
127. OIE. 2013. OIE Tool for the Evaluation of Performance of Veterinary Services (OIE PVS Tool) Sixth edition, 2013.
128. OIE. 2013. OIE GLOBAL CONFERENCE ON THE RESPONSIBLE AND PRUDENT USE OF ANTIMICROBIAL AGENTS FOR ANIMALS “International solidarity to fight against antimicrobial resistance”. Paris, France, 13–15 March 2013.
129. OIE. 2014. OIE LIST OF ANTIMICROBIAL AGENTS OF VETERINARY IMPORTANCE. January 2014.
130. OIE. 2015. REPORT OF THE MEETING OF THE OIE AD HOC GROUP ON PRIORITISATION OF DISEASES FOR WHICH VACCINES COULD REDUCE ANTIMICROBIAL USE IN ANIMALS Paris, 21 – 23 April 2015.
131. OIE. 2015. An update on OIE activities related to antimicrobial use and resistance in the livestock sector. Presentation by Elisabeth Erlacher Vindel. OECD Workshop on the Economics of Antimicrobial Use and Resistance in the Livestock Sector. Paris (France), 12 October 2015.
132. OIE. 2015. OIE LIST OF ANTIMICROBIAL AGENTS OF VETERINARY IMPORTANCE. May 2015.
133. OIE. 2015. Combating Antimicrobial Resistance and Promoting the Prudent Use of Antimicrobial Agents in Animals. RESOLUTION No. 26.
134. OIE. 2015. Antimicrobial resistance: Summary of OIE Activities. July 2015.
135. OIE. 2016. REPORT OF THE MEETING OF THE OIE AD HOC GROUP ON ANTIMICROBIAL RESISTANCE. Paris, 21 – 23 June 2016.
136. OIE. 2016. OIE Annual report on the use of antimicrobial agents in animals: BETTER UNDERSTANDING OF THE GLOBAL SITUATION.

Didier Wernli, Stephan Harbarth, Nicolas Levrat, Didier Pittet

137. OIE. 2016. Combating Antimicrobial Resistance through a One Health Approach: Actions and OIE Strategy. Resolution No. 36.
138. OIE. 2016. The OIE PVS Pathway Global Health Security Agenda (GHSA) Action Package Coordination Meeting. Jakarta, 23 August, 2016.
139. OIE. 2016. The OIE Strategy on Antimicrobial Resistance and the Prudent Use of Antimicrobials. November 2016.
140. OIE. 2017. REPORT OF THE MEETING OF THE OIE AD HOC GROUP ON ANTIMICROBIAL RESISTANCE. Paris, 29-31 August 2017.
141. OIE. 2017. OIE Annual report on antimicrobial agents intended for use in animals: Better understanding of the global situation.
142. OIE. 2017. Chapter 6.2. Principles for responsible and prudent use of antimicrobial agents in aquatic animals. Aquatic animal health code.
143. OIE. 2017. Chapter 6.3 Monitoring of the quantities and usage patterns of antimicrobial agents used in aquatic animals. Aquatic animal health code.
144. OIE. 2017. Chapter 6.4 Development and harmonisation of national antimicrobial resistance surveillance and monitoring programmes for aquatic animals. Aquatic animal health code.
145. OIE. 2017. Chapter 6.5 Risk analysis for antimicrobial resistance arising from the use of antimicrobial agents in aquatic animals. Aquatic animal health code.
146. OIE. 2017. Chapter 6.10. Risk analysis for antimicrobial resistance arising from the use of antimicrobial agents in animals. Terrestrial animal health code.
147. OIE. 2017. Chapter 6.7. Harmonisation of national antimicrobial resistance surveillance and monitoring programmes. Terrestrial animal health code.
148. OIE. 2017. Chapter 6.8. Monitoring of the quantities and usage patterns of antimicrobial agents used in food-producing animals. Terrestrial animal health code.
149. OIE. 2017. Chapter 6.9 Responsible and prudent use of antimicrobial agents in veterinary medicine. Terrestrial animal health code.
150. OIE. 2018. REPORT OF THE MEETING OF THE OIE AD HOC GROUP ON ANTIMICROBIAL RESISTANCE. Paris, 22-24 January 2018.
151. OIE. 2018. REPORT OF THE MEETING OF THE OIE AD HOC GROUP ON ANTIMICROBIAL RESISTANCE. Paris, 3-5 July 2018.
152. United Nations Security Council. 2000. Resolution 1308 on the Responsibility of the Security Council in the Maintenance of International Peace and Security: HIV/AIDS and International Peace-keeping Operations.
153. Stop TB. non dated. Stop TB Partnership TB Human Rights Task Force - WORKING DOCUMENT on TB and Human Rights.
154. United Nations. 2016. High level panel on water. Action Plan. 21 September 2016
155. UNEP. 2017. Chapter 1. Antimicrobial Resistance: Investigating the Environmental Dimension. FRONTIERS 2017: EMERGING ISSUES OF ENVIRONMENTAL CONCERN.
156. UNEP. 2018. United Nations Environment Assembly of the United Nations Environment. Environment and Health. Resolution UNEP/EA.3/Res.4.
157. UNGA. 2015. Global health and foreign policy: strengthening the management of international health crises. Resolution A/RES/70/183.
158. UNGA. 2016. Scope, modalities, format and organization of the high-level meeting on antimicrobial resistance convened by the President of the General Assembly. Resolution A/RES/70/297.
159. UNGA. 2016. Consolidating gains and accelerating efforts to control and eliminate malaria in developing countries, particularly in Africa, by 2030. Resolution A/RES/70/300.
160. UNGA. 2016. Political declaration of the high-level meeting of the General Assembly on antimicrobial resistance. Resolution A/RES/71/3.
161. UNGA. 2018. Political declaration of the high-level meeting of the General Assembly on the fight against tuberculosis. Resolution A/RES/73/3.
162. UNGA. 2019. Follow-up to the political declaration of the high-level meeting of the General Assembly on antimicrobial resistance. Report of the Secretary-General A/73/869.
163. UNGA. 2019. Political declaration of the high-level meeting on universal health coverage. Resolution A/RES/74/2.
164. UNICEF WHO. 2009. Global Action Plan for Prevention and Control of Pneumonia (GAPP).
165. UNICEF WHO. 2015. Progress on sanitation and drinking water – 2015 update and MDG assessment.
166. UNSG. 2016. Report of the UNITED NATIONS SECRETARY-GENERAL'S HIGH-LEVEL PANEL ON ACCESS TO MEDICINES.
167. WHO FAO OIE. 2020. TECHNICAL BRIEF ON WATER, SANITATION, HYGIENE AND WASTEWATER MANAGEMENT TO PREVENT INFECTIONS AND REDUCE THE SPREAD OF ANTIMICROBIAL RESISTANCE.

Didier Wernli, Stephan Harbarth, Nicolas Levrat, Didier Pittet

168. WHO FAO OIE. 2021. Antimicrobial Resistance Multi-Partner Trust Fund Forging Tripartite collaboration for urgent global and country action against antimicrobial resistance
169. WHO OIE FAO. 2021. Antimicrobial Resistance - Tripartite Update. Presentation by Liz Tayler to Internal EU AMR One Health network. Spring 2021.
170. WHO WTO 2002. WTO Agreements and Public Health: A joint study by the WHO and WTO Secretariat.
171. WHO. 1949. AVAILABILITY OF TECHNICAL KNOWLEDGE OF PRODUCTION PROCESSES OF ANTIBIOTICS: PENICILLIN, STREPTOMYCIN, CHLOROMYCETIN, AUREOMYCIN. Agenda document A2/13.
172. WHO. 1949. RESEARCH IN ANTIBIOTICS. Agenda document EB5/38.
173. WHO. 1949. Availability of technical Knowledge of Production Processes of Antibiotics. Resolution WHA2.44
174. WHO. 1950. EXPERT COMMITTEE ON ANTIBIOTICS. Agenda document EB6/39.
175. WHO. 1950. Expert Committee on Antibiotics : Report on First Session. Resolution EB6R18.
176. WHO. 1950. Expert Committee on Antibiotics : Report on the First Session. Resolution WHA3.13.
177. WHO. 1950. EXPERT COMMITTEE ON ANTIBIOTICS. Report on the First Session. World Health Organization Technical Report Series No. 26. Geneva, 11-15 April 1950.
178. WHO. 1952. ASSISTANCE TO GOVERNMENTS IN THE MANUFACTURE OF ANTIBIOTICS AND INSECTICIDES. Agenda document A5/17.
179. WHO. 1952. THE PRODUCTION OF ANTIBIOTICS AND PESTICIDES. Agenda document EB9/105.
180. WHO. 1952. Production of Antibiotics and Insecticides. Resolution EB9R100.
181. WHO. 1952. Production of Insecticides and Antibiotics. Resolution WHA5.30.
182. WHO. 1952. Publicity given to " Wonder " or " Miracle " Drugs. Resolution WHA5.76.
183. WHO. 1955. Malaria Eradication. Resolution WHA8.30.
184. WHO. 1956. Malaria Eradication. Resolution WHA9.61.
185. WHO. 1961. STANDARDIZATION OF METHODS FOR CONDUCTING MICROBIC SENSITIVITY TESTS Second Report of the Expert Committee on Antibiotics. WORLD HEALTH ORGANIZATION TECHNICAL REPORT SERIES No. 210.
186. WHO. 1963. Report on the Development of the Malaria Eradication Program. Resolution WHA16.23.
187. WHO. 1963. THE PUBLIC HEALTH ASPECTS OF THE USE OF ANTIBIOTICS IN FOOD AND FEEDSTUFFS. Report of an Expert Committee. WORLD HEALTH ORGANIZATION TECHNICAL REPORT SERIES No. 260.
188. WHO. 1965. Additional Regulations of 12 May 1965 amending the International Sanitary Regulations, in particular with respect to Disinsecting of Ships and Aircraft, and Appendices 3 and 4 (Forms of the International Certificates of Vaccination or Revaccination against Yellow Fever and against Smallpox). Resolution WHA18.5.
189. WHO. 1968. Pharmaceutical Advertising. Resolution WHA21.41.
190. WHO. 1969. Research on Methods of Vector Control. Resolution WHA22.40.
191. WHO. 1969. Diseases under Surveillance : Malaria. Resolution WHA22.48.
192. WHO. 1969. SPECIFICATIONS FOR THE IDENTITY AND PURITY OF FOOD ADDITIVES AND THEIR TOXICOLOGICAL EVALUATION: SOME ANTIBIOTICS. Twelfth Report of the Joint FAO/WHO Expert Committee on Food Additives. TECHNICAL REPORT SERIES No. 430 FAO NUTRITION MEETINGS REPORT SERIES No. 45
193. WHO. 1971. Cholera pandemic. Resolution WHA24.26.
194. WHO. 1972. QUALITY, SAFETY AND EFFICACY OF DRUGS Report by the Director -General A25/13.
195. WHO. 1978. Control of sexually transmitted diseases. Resolution WHA31.57.
196. WHO. 1978. Surveillance for the prevention and control or health hazards due to antibiotic-resistant enterobacteria. Report of a WHO Meeting. World Health Organization Technical Report Series 624.
197. WHO. 1980. TUBERCULOSIS CONTROL. Resolution WHA33.26.
198. WHO. 1981. ANTIMICROBIAL RESISTANCE. Report of a Scientific Working Group Geneva, 23-27 November 1981.
199. WHO. 1982. Surveillance of antimicrobial resistance. Report of a consultation. Geneva, 22-26 November 1982.
200. WHO. 1984. INTERNATIONAL STANDARDS AND UNITS FOR BIOLOGICAL SUBSTANCES. Resolution WHA37.27.
201. WHO. 1984. RATIONAL USE OF DRUGS. Resolution WHA37.33.
202. WHO. 1985. The rational use of drugs. Report of the Conference of Experts Nairobi, 25-29 November 1985.
203. WHO. 1986. THE RATIONAL USE OF DRUGS. Resolution WHA39.27.
204. WHO. 1988. ETHICAL CRITERIA FOR MEDICINAL DRUG PROMOTION. Resolution WHA41.17.
205. WHO. 1990. Guidelines for surveillance and control of antimicrobial resistance.
206. WHO. 1991. Surveillance of antimicrobial resistance of Streptococcus Pneumoniae and Hemophilus Influenzae. Report of Meeting. Geneva, 10-13 December 1990.
207. WHO. 1991. CONTROL OF ACUTE RESPIRATORY INFECTIONS. Resolution WHA44.7.
208. WHO. 1991. Tuberculosis control programme. Resolution WHA44.8.

Didier Wernli, Stephan Harbarth, Nicolas Levrat, Didier Pittet

209. WHO. 1992. IMMUNIZATION AND VACCINE QUALITY. Resolution WHA45.17.
210. WHO. 1992. WHO ETHICAL CRITERIA FOR MEDICINAL DRUG PROMOTION. Resolution WHA45.30.
211. WHO. 1992. REPORT OF THE WHO WORKING GROUP ON ANTIMICROBIAL RESISTANCE. Weybridge, United Kingdom, 4 December 1991.
212. WHO. 1993. TUBERCULOSIS PROGRAMME. Resolution WHA46.36.
213. WHO. 1994. Implementation of WHO'S revised drug strategy: Rational use of drugs. Resolution WHA47.13.
214. WHO. 1994. WHO ethical criteria for medicinal drug promotion. Resolution WHA47.16.
215. WHO. 1994. Implementation of WHO'S Revised Drug Strategy Safety, Efficacy and Quality of Pharmaceuticals. Resolution WHA47.17.
216. WHO. 1994. WHO Scientific Working Group on Monitoring and Management of Bacterial Resistance to Antimicrobial Agents. Geneva, Switzerland 29 November-2 December 1994.
217. WHO. 1995. Control of diarrhoeal diseases and acute respiratory infections: integrated management of the sick child. Resolution WHA48.12.
218. WHO. 1995. Communicable diseases prevention and control: new, emerging, and re-emerging infectious diseases. Resolution WHA48.13.
219. WHO. 1996. Emerging and other Communicable Diseases. Strategic Plan. WHO/EMC/96.1.
220. WHO. 1996. Industry and the WHO Network on Antimicrobial Resistance Monitoring: Opportunities for Collaboration.
221. WHO. 1996. Recommendations for the Control of Methicillin-Resistant Staphylococcus aureus (MRSA).
222. WHO. 1996. New, emerging and re-emerging infectious diseases: special programme on malaria. Resolution WHA49.11.
223. WHO. 1996. The World Health Report 1996 Fighting disease Fostering Development. Report of the Director-General.
224. WHO. 1997. Emerging and other communicable diseases: antimicrobial resistance. Agenda document EB101/13.
225. WHO. 1997. ANTI-TUBERCULOSIS DRUG RESISTANCE IN THE WORLD. 1st global report. The WHO/IUATLD Global Project on Anti-tuberculosis Drug Resistance Surveillance 1994 - 1997. WHO Global Tuberculosis Programme, Geneva.
226. WHO. 1997. Quality assurance of pharmaceuticals : A compendium of guidelines and related materials.
227. WHO. 1997. The Medical Impact of Antimicrobial Use in Food Animals. Report of WHO Meeting. Berlin, Germany, 13-17 October 1997.
228. WHO. 1998. Antimicrobial Resistance Monitoring: Information Exchange and Opportunities for Collaboration Report of the Second Joint WHO/IFPMA Meeting, Geneva 2-3 April 1998.
229. WHO. 1998. Use of Quinolones in Food Animals and Potential Impact on Human Health Report and Proceedings of a WHO Meeting. Geneva, Switzerland 2-5 June 1998.
230. WHO. 1998. Antimicrobial Resistance Monitoring: Update of Activities 1997/1998.
231. WHO. 1998. Emerging and other communicable diseases: antimicrobial resistance. Report by the Director-General A51/9.
232. WHO. 1998. Global elimination of blinding trachoma. Resolution WHA51.11.
233. WHO. 1998. Resolution 51.13 Tuberculosis. Resolution WHA51.13.
234. WHO. 1998. Emerging and other communicable diseases: antimicrobial resistance. Resolution WHA51.17.
235. WHO. 1998. The protection of human health from threats related to climate change and stratospheric ozone depletion. Resolution WHA51.29.
236. WHO. 1999. PROCUREMENT OF SECOND-LINE ANTI-TUBERCULOSIS DRUGS FOR DOTS-PLUS PILOT PROJECTS WHO Working Group on DOTS-Plus for MDR-TB. Proceedings of a Meeting Cambridge, USA, 5-6 July 1999.
237. WHO. 1999. Multidrug Resistant Tuberculosis : basis for the development of an evidence-based case-management strategy for MDR TB within the WHO's DOTS strategy : proceedings of 1998 meetings and protocol recommendations.
238. WHO. 1999. Roll Back Malaria. Resolution WHA52.11.
239. WHO. 1999. Revised drug strategy. Resolution WHA52.19.
240. WHO. 1999. Containing antimicrobial resistance : review of the literature and report of a WHO Workshop on the Development of a Global Strategy for the Containment of Antimicrobial Resistance, Geneva, Switzerland, 4-5 February 1999.
241. WHO. 1999. WHO Meeting to co-ordinate the DOTS-plus workplan on pilot projects for the management of multidrug resistant (MDR) tuberculosis (TB). 29 January 1999.
242. WHO. 2000. WHO Global Principles for the Containment of Antimicrobial Resistance in Animals Intended for Food. Report of a WHO Consultation with the participation of the Food and Agriculture Organization of the United Nations and the Office International des Epizooties. Geneva, Switzerland 5-9 June 2000
243. WHO. 2000. Anti-tuberculosis Drug Resistance in the World. Report no. 2: Prevalence and trends. The WHO/IUATLD Global Project on Anti-tuberculosis Drug Resistance Surveillance.

Didier Wernli, Stephan Harbarth, Nicolas Levrat, Didier Pittet

244. WHO. 2000. Guidelines for establishing DOTS-Plus pilot projects for the management of multidrug-resistant tuberculosis (MDR-TB) / writing committee: Scientific Panel of the WHO Working Group on DOTS-Plus for MDR-TB.
245. WHO. 2000. Overcoming Antimicrobial Resistance. World Health Organization Report on Infectious Diseases.
246. WHO. 2000. Stop Tuberculosis Initiative. Resolution WHA53.1.
247. WHO. 2000. HIV/AIDS: confronting the epidemic. Resolution WHA53.14.
248. WHO. 2000. Food safety. Resolution WHA53.15.
249. WHO. 2001. Surveillance standards for antimicrobial resistance. A BACKGROUND DOCUMENT FOR THE WHO GLOBAL STRATEGY FOR CONTAINMENT OF ANTIMICROBIAL RESISTANCE.
250. WHO. 2001. Infection control programmes to contain antimicrobial resistance
251. WHO. 2001. WHO Global Strategy for the Containment of Antimicrobial Resistance
252. WHO. 2001. Antibiotic resistance: synthesis of recommendations by expert policy groups. Alliance for the Prudent Use of Antibiotics.
253. WHO. 2001. Progress DOTS plus and management of MDR-TBProgress in DOTS-Plus and the management of multidrug-resistant tuberculosis (MDR-TB) : proceedings of the meeting of the Stop TB Working Group on DOTS-Plus for MDR-TB, Lima, Peru, 25-27 January 2001-TB.
254. WHO. 2001. Global Health SecurityGlobal health security - epidemic alert and response Report by the Secretariat. Report by Secretariat. A54.9.
255. WHO. 2001. Scaling up the response to HIV/AIDS. Resolution WHA54.10.
256. WHO. 2001. WHO medicines strategy. Resolution WHA54.11
257. WHO. 2001. Global health security: epidemic alert and response. Resolution WHA54.14.
258. WHO. 2001. Monitoring antimicrobial usage in food animalsMonitoring antimicrobial usage in food animals for the protection of human health. Report of a WHO consultation. Oslo, Norway 10-13 September 2001.
259. WHO. 2001. Monitoring Antimalarial Drug Resistance. Report of a WHO consultation. Geneva, Switzerland 3-5 December 2001.
260. WHO. 2002. Implementation Workshop on the WHO Global Strategy for Containment of Antimicrobial Resistance. Geneva, Switzerland, 25-26 November 2002 .
261. WHO. 2002.DOTS-Plus : preliminary results and emerging issues. Proceedings of the meeting of the Stop TB Working Group on DOTS-Plus for MDR-TB. Tallinn, Estonia, 10-12 April 2002
262. WHO. 2002. Impacts of antimicrobial growth promoter termination in Denmark. The WHO international review panel's evaluation of the termination of the use of antimicrobial growth promoters in Denmark. Foulum, Denmark, 6-9 November 2002.
263. WHO. 2002. Prevention of hospital-acquired infections A practical guide 2nd edition.
264. WHO. 2002. Ensuring accessibility of essential medicines. Resolution WHA55.14.
265. WHO. 2002. Quality of care: patient safety. Resolution WHA55.18.
266. WHO. 2002. Surveillance standards for antimicrobial resistance.
267. World Health Organization WHO Technical Report Series, No. 902, 2002...
268. WHO. 2002. WHO global strategy for food safety : safer food for better health.
269. WHO. 2003. GUIDELINES FOR SURVEILLANCE OF DRUG RESISTANCE IN TUBERCULOSIS. SECOND EDITION.
270. WHO. 2003. Prevention and control of influenza pandemics and annual epidemics. Resolution WHA56.19.
271. WHO. 2003. Intellectual property rights, innovation and public health. Resolution WHA56.27.
272. WHO. 2003. WHO Medicines Strategy: Framework for Action in Essential Drugs and Medicines Policy 2000-2003.
273. WHO. 2003. Fourth annual meeting of the Stop TB Working Group on DOTS-Plus for MDR-TB. Paris, France 27-28 October 2003
274. WHO. 2004. WHO workshop on the containment of antimicrobial resistance in europe. Report of WHO Meeting. Wernigerode, Germany, 26-27 February 2004.
275. WHO. 2004. ANTI-TUBERCULOSIS DRUG RESISTANCE IN THE WORLD. Third Global Report.
276. WHO. 2004. Scaling up treatment and care within a coordinated and comprehensive reponse to HIV/AIDS. Resolution WHA57.14.
277. WHO. 2004. Control of human African trypanosomiasis. Resolution WHA57.2.
278. WHO. 2005. CRITICALLY IMPORTANT ANTIBACTERIAL AGENTS FOR HUMAN MEDICINE FOR RISK MANAGEMENT STRATEGIES OF NON-HUMAN USE. Report of a WHO working group consultation. Canberra, Australia, 15 - 18 February 2005.
279. WHO. 2005. Containing antimicrobial resistance. WHO Policy Perspectives on Medicines. April 2005.

Didier Wernli, Stephan Harbarth, Nicolas Levrat, Didier Pittet

280. WHO. 2005. Annex 5 Guidelines for registration of fixed-dose combination medicinal products. WHO Technical Report Series, No. 929, 2005.
281. WHO. 2005. Global Immunization Vision and Strategy 2006-2015.
282. WHO. 2005. Antimicrobial resistance: a threat to global health security. Rational use of medicines by prescribers and patients. Report by the Secretariat A58/14.
283. WHO. 2005. Sustainable financing for tuberculosis prevention and control. Resolution WHA58.14.
284. WHO. 2005. Global immunization strategy. Resolution WHA58.15.
285. WHO. 2005. Malaria control. Resolution WHA58.2.
286. WHO. 2005. Improving the containment of antimicrobial resistance. Resolution WHA58.27.
287. WHO. 2005. Revision of the International Health Regulations. Resolution WHA58.3.
288. WHO. 2006. Public health, innovation and intellectual property rights. REPORT OF THE COMMISSION ON INTELLECTUAL PROPERTY RIGHTS, INNOVATION AND PUBLIC HEALTH.
289. WHO. 2006. Public health, innovation, essential health research and intellectual property rights: towards a global strategy and plan of action. Resolution WHA59.24.
290. WHO. 2006. Setting priorities in communicable disease surveillance.
291. WHO. 2006. THE STOP TB STRATEGY: Building on and enhancing DOTS to meet the TB-related Millennium Development Goals.
292. WHO. 2007. Critically Important Antimicrobials for Human Medicine: Categorization for the Development of Risk Management Strategies to contain Antimicrobial Resistance due to Non-Human Antimicrobial Use. Report of the Second WHO Expert Meeting. Copenhagen, 29–31 May 2007.
293. WHO. 2007. Animal feed impact on food safety.pdf Animal Feed Impact on Food Safety Report of the FAO/WHO Expert Meeting FAO Headquarters, Rome, 8-12 October 2007.
294. WHO. 2007. Global Framework for Immunization monitoring and Surveillance.
295. WHO. 2007. The Global MDR-TB & XDR-TB Response Plan 2007-2008.
296. WHO. 2007. Progress reports on technical and health matters. Report by the secretariat A60.28.
297. WHO. 2007. Progress in the rational use of medicines. Resolution WHA60.16.
298. WHO. 2007. Malaria, including proposal for establishment of World Malaria Day. Resolution WHA60.18.
299. WHO. 2007. Tuberculosis control: progress and long-term planning. Resolution WHA60.19.
300. WHO. 2007. Better medicines for children. Resolution WHA60.20.
301. WHO. 2007. Pandemic influenza preparedness: sharing of influenza viruses and access to vaccines and other benefits. Resolution WHA60.28.
302. WHO. 2007. Global public health Security in the 21st century: A safer future. The world health report 2007.
303. WHO. 2008. ANTI-TUBERCULOSIS DRUG RESISTANCE IN THE WORLD. Fourth Global Report The World Health Organization/International Union Against Tuberculosis and Lung Disease (WHO/UNION) Global Project on Anti-Tuberculosis Drug Resistance Surveillance 2002–2007.
304. WHO. 2008. Guidelines for the programmatic management of drug-resistant tuberculosis : Emergency update 2008.
305. WHO. 2008. Global immunization strategy. Resolution WHA61.15.
306. WHO. 2008. Global strategy and plan of action on public health, innovation and intellectual property. Resolution WHA61.21.
307. WHO. 2009. Report of the 1st meeting of the WHO advisory group on integrated surveillance of antimicrobial resistance. Copenhagen, 15-19 June 2009.
308. WHO. 2009. THE BEIJING "CALL FOR ACTION" ON TUBERCULOSIS CONTROL AND PATIENT CARE: TOGETHER ADDRESSING THE GLOBAL M/XDR-TB EPIDEMIC.
309. WHO. 2009. Core components for infection prevention and control programmes. Report of the Second Meeting Informal Network on Infection Prevention and Control in Health Care Geneva, Switzerland 26–27 June 2008.
310. WHO. 2009. Guidelines for surveillance of drug resistance in tuberculosis. Fourth Edition.
311. WHO. 2009. WHO Guidelines on Hand Hygiene in Health Care. First Global Patient Safety Challenge: Clean Care is Safer Care.
312. WHO. 2009. Implications of the 2009 World Health Assembly resolution on the Prevention and control of multidrug-resistant tuberculosis (MDR-TB) and extensively drug-resistant tuberculosis (XDR-TB).
313. WHO. 2009. Prevention and control of multidrug-resistant tuberculosis and extensively drug-resistant tuberculosis. Report by Secretariat A62/20.
314. WHO. 2009. Prevention and control of multidrug-resistant tuberculosis and extensively drug-resistant tuberculosis. Resolution WHA62.15.

Didier Wernli, Stephan Harbarth, Nicolas Levrat, Didier Pittet

315. WHO. 2009. Global strategy and plan of action on public health, innovation and intellectual property. Resolution WHA62.16.
316. WHO. 2009. METHODS FOR SURVEILLANCE OF ANTIMALARIAL DRUG EFFICACY.
317. WHO. 2009. WHO Guidelines on Hand Hygiene in Health Care. First Global Patient Safety Challenge: Clean Care is Safer Care.
318. WHO. 2010. Annex 5 WHO good distribution practices for pharmaceutical products. WHO Technical Report Series, No. 957, 2010.
319. WHO. 2010. Report of the 2nd meeting of the WHO advisory group on integrated surveillance of antimicrobial resistance, Guelph, Canada, 5-7 June 2010.
320. WHO. 2010. Global report on antimalarial drug efficacy and drug resistance: 2000–2010.
321. WHO. 2010. ANNUAL REPORT 2009. Green Light Committee Initiative of the Working Group on Multidrug-resistant Tuberculosis of the Stop TB Partnership.
322. WHO. 2010. Management of MDR-TB: A field guide. A companion document to Guidelines for the programmatic management of drug-resistant tuberculosis
323. WHO. 2010. Multidrug and extensively drug-resistant TB (M/XDR-TB) 2010. GLOBAL REPORT ON SURVEILLANCE AND RESPONSE.
324. WHO. 2010. RESEARCH AND DEVELOPMENT COORDINATION AND FINANCING. REPORT OF THE EXPERT WORKING GROUP.
325. WHO. 2010. Monitoring of the achievement of the health-related Millennium Development Goals. Resolution WHA63.15.
326. WHO. 2010. WHO HIV/AIDS strategy for 2011–2015. Resolution WHA63.19.
327. WHO. 2010. Establishment of a consultative expert working group on research and development: financing and coordination. Resolution WHA63.28.
328. WHO. 2010. Advancing food safety initiatives. Resolution WHA63.3.
329. WHO. 2010. Annex 1 WHO good practices for pharmaceutical quality control laboratories. WHO Technical Report Series, No. 957, 2010.
330. WHO. 2010. Annex 2 WHO good manufacturing practices for active pharmaceutical ingredients. WHO Technical Report Series, No. 957, 2010.
331. WHO. 2010. WHO good manufacturing practices for pharmaceutical products containing hazardous substances. Annex 3. WHO Technical Report Series, No. 957, 2010.
332. WHO. 2010. WHO good manufacturing practices for active pharmaceutical ingredients. Annex 2.
333. WHO. 2013. POCKET BOOK OF Hospital care for children. GUIDELINES FOR THE MANAGEMENT OF COMMON CHILDHOOD ILLNESSES. Second edition
334. WHO. 2011. Critically Important Antimicrobials for Human Medicine. WHO advisory group on integrated surveillance of antimicrobial resistance (AGISAR). 3rd Revision 2011.
335. WHO. 2011. Global Strategy and Plan of Action on Public Health, Innovation and Intellectual Property.
336. WHO. 2011. Guidelines for the programmatic management of drug-resistant tuberculosis 2011 update.
337. WHO. 2011. Joint FIP/WHO guidelines on good pharmacy practice: standards for quality of pharmacy services. WHO Technical Report Series, No. 961, 2011 Annex 8.
338. WHO. 2011. Model guidance for the storage and transport of time- and temperature-sensitive pharmaceutical products. WHO Technical Report Series, No. 961, 2011.
339. WHO. 2011. COMBATING ANTIMICROBIAL RESISTANCE: EXPERIENCES FROM THE FIELD. A reference book describing the need for and examples of successful interventions.
340. WHO. 2011. POLICY PACKAGE TO COMBAT ANTIMICROBIAL RESISTANCE.
341. WHO. 2011. Report on the Burden of Endemic Health Care-Associated Infection Worldwide. Clean Care is Safer Care.
342. WHO. 2011. Drinking-Water, Sanitation and Health. Resolution WHA 64.24.
343. WHO. 2011. Cholera: mechanism for control and prevention. Resolution WHA64.15.
344. WHO. 2011. Malaria. Resolution WHA64.17.
345. WHO. 2011. Marketing Authorization of Pharmaceutical Products with Special Reference to Multisource (Generic) Products. A manual for National Medicines Regulatory Authorities (NMRAs). 2nd edition.
346. WHO. 2012. Report of the 3rd meeting of the WHO advisory group on integrated surveillance of antimicrobial resistance, 14-17 June 2011, Oslo, Norway.

Didier Wernli, Stephan Harbarth, Nicolas Levrat, Didier Pittet

347. WHO. 2012. Research and Development to Meet Health Needs in Developing Countries: Strengthening Global Financing and Coordination Report of the Consultative Expert Working Group on Research and Development: Financing and Coordination. Report 5.
348. WHO. 2012. Antimicrobial resistance in the European Union and the world. Keynote address by Margaret Chan at the conference on Combating antimicrobial resistance: time for action. Copenhagen, Denmark, 14 March 2012.
349. WHO. 2012. Global action plan to control the spread and impact of antimicrobial resistance in *Neisseria gonorrhoeae*.
350. WHO. 2012. World Health Organization Global Strategy for the surveillance and monitoring of HIV drug resistance.
351. WHO. 2012. Global vaccine action plan. Resolution WHA65.17.
352. WHO. 2012. Substandard/spurious/falsely-labelled/falsified/ counterfeit medical products. Resolution WHA65.19.
353. WHO. 2012. Follow up of the report of the Consultative Expert Working Group on Research and Development: Financing and Coordination. Resolution WHA65.22.
354. WHO. 2012. The WHO strategy on research for health.
355. WHO. 2012. The evolving threat of antimicrobial resistance : Options for action.
356. WHO. 2013. Integrated surveillance.pdf Integrated surveillance of antimicrobial resistance: guidance from a WHO Advisory Group.
357. WHO. 2013. 5th Meeting of the WHO Advisory Group on Integrated Surveillance of Antimicrobial Resistance, 3-5 September 2013, Bogotá, Colombia
358. WHO. 2013. WHO Director-General addresses an expert advisory group on antimicrobial resistance. Discourse by Margaret Chan at strategic and technical advisory group. 2013.09.19.
359. WHO. 2013. Global Vaccine Action Plan 2011–2020.
360. WHO. 2013. Annex 2 WHO guidelines on quality risk management. WHO Expert Committee on Specifications for Pharmaceutical Preparations. Forty-seventh report.
361. WHO. 2013. Minutes of the Drug Resistance and Containment Technical Expert Group. 27-28 June 2013 Geneva, Switzerland.
362. WHO. 2013. Malaria. Report by the Secretariat A66/21.
363. WHO. 2013. Antimicrobial drug resistance. Report by the Secretariat EB134/37.
364. WHO. 2013. Follow up of the report of the Consultative Expert Working Group on Research and Development: Financing and Coordination. Resolution WHA66.22.
365. WHO. 2013. Implementation of the recommendations of the United Nations Commission on Life-Saving Commodities for Women and Children. Resolution WHA66.7.
366. WHO. 2013. Strategic and technical advisory group: Tackling AMR (STAG-AMR). AGENDA of the first meeting. 19-20 September 2013
367. WHO. 2013. Strategic and Technical Advisory Group on Antimicrobial Resistance (STAG-AMR). Report of the first meeting. Geneva, 19-20 September 2013.
368. WHO. 2013. Strategic Plan for Food Safety Including Foodborne Zoonoses 2013–2022.
369. WHO. 2013. The use of bedaquiline in the treatment of multidrug-resistant tuberculosis. Interim policy guidance.
370. WHO. 2014. WHO's first global report on antibiotic resistance reveals serious, worldwide threat to public health. Media centre. 30 April 2014.
371. WHO. 2014. WHO Director-General addresses ministerial conference on antimicrobial resistance. Discourse by Margaret Chan. 25 June 2014.
372. WHO. 2014. Global action plan to combat antimicrobial resistance. Presentation.
373. WHO. 2014. Antimicrobial resistance: global report on surveillance.
374. WHO. 2014. DRUG-RESISTANT TB SURVEILLANCE & RESPONSE SUPPLEMENT GLOBAL TUBERCULOSIS REPORT 2014.
375. WHO. 2014. Combating antimicrobial resistance, including antibiotic resistance. Draft resolution proposed by Australia, China, Costa Rica, Ghana, Japan, Libya, Mexico, Netherlands, Qatar, Sweden, Thailand, United Kingdom of Great Britain and Northern Ireland and United States of America. EB134/CONF./1.
376. WHO. 2014. Antimicrobial Resistance: An Emerging Water, Sanitation and Hygiene Issue. Briefing Note.
377. WHO. 2014. Minutes of the Drug Resistance and Containment Technical Expert Group. Geneva, Switzerland 28-30 April 2014.
378. WHO. 2014. POLICY IMPLEMENTATION PACKAGE FOR NEW TB DRUG INTRODUCTION.
379. WHO. 2014. Draft global action plan on antimicrobial resistance. Report by the Secretariat A67/39.
380. WHO. 2014. Antimicrobial drug resistance. Report by the Secretariat A67/39.
381. WHO. 2014. Antimicrobial resistance: Summary report on progress made in implementing resolution WHA67.25 on antimicrobial resistance. Report by the Secretariat EB136/19.



Didier Wernli, Stephan Harbarth, Nicolas Levrat, Didier Pittet

382. WHO. 2014. Global strategy and targets for tuberculosis prevention, care and control after 2015. Resolution WHA67.1.
383. WHO. 2014. Strengthening of palliative care as a component of comprehensive care throughout the life course. Resolution WHA67.19.
384. WHO. 2014. Regulatory system strengthening for medical products. Resolution WHA67.20.
385. WHO. 2014. Access to essential medicines. Resolution WHA67.22.
386. WHO. 2014. Antimicrobial resistance. Resolution WHA67.25.
387. WHO. 2014. 2nd Meeting of the Strategic and Technical Advisory Group on Antimicrobial Resistance : Consultation on development of a Global Action Plan (GAP) for tackling antimicrobial resistance. Agenda documents.
388. WHO. 2014. Strategic and Technical Advisory Group on Antimicrobial Resistance (STAG-AMR). Report of Second Meeting. Geneva, 14-16 April 2014.
389. WHO. 2014. Meeting of the WHO Strategic and Technical Advisory Group for Antimicrobial Resistance. Summary of advice and recommendations for WHO. April 2014.
390. WHO. 2014. STAG AMR. 2nd meeting. 4.all presentations Keiji Fukuda. Antimicrobial Resistance: Global Action Plan Going Forward. Presentation at the Strategic Technical Advisory Group. Geneva 14 April 2014
391. WHO. 2014. 3rd Meeting of the Strategic and Technical Advisory Group on antimicrobial resistance (STAG - AMR). AGENDA. 17 October 2014.
392. WHO\_2014\_Annex 2 WHO good manufacturing practices for pharmaceutical products: main principles. WHO Expert Committee on Specifications for Pharmaceutical Preparations. Forty-eighth report.
393. WHO. 2014. Guidance for national tuberculosis programmes on the management of tuberculosis in children. Second edition
394. WHO. 2014. Annex 3 Model quality assurance system for procurement agencies. WHO Expert Committee on Specifications for Pharmaceutical Preparations. Forty-eighth report.
395. WHO. 2014. Revised WHO classification and treatment of childhood pneumonia at health facilities. EVIDENCE SUMMARIES.
396. WHO. 2014. Safe management of wastes from health-care activities. 2nd edition
397. WHO. 2015. WHO Director-General addresses G7 health ministers meeting on antimicrobial resistance : Remarks by Margaret Chan at the G7 Health Ministers Meeting. Session on antimicrobial resistance: realizing the "one health" approach. Berlin, Germany 8 October 2015.
398. WHO. 2015. INVESTING IN THE DEVELOPMENT OF NEW ANTIBIOTICS AND THEIR CONSERVATION A PROPOSAL FOR A GLOBAL ANTIBIOTIC RESEARCH AND DEVELOPMENT FACILITY TO PROMOTE RESEARCH, RESPONSIBLE USE, AND ACCESS TO NEW ANTIBIOTICS. EXPANDED CONCEPT NOTE. 2 NOVEMBER 2015.
399. WHO. 2015. ANTIBIOTIC RESISTANCE: MULTI-COUNTRY PUBLIC AWARENESS SURVEY.
400. WHO. 2015. Report of the 6th Meeting WHO Advisory Group on Integrated Surveillance of Antimicrobial Resistance with AGISAR 5-year Strategic Framework to Support Implementation of the Global Action Plan on Antimicrobial Resistance (2015-2019). Seoul, Republic of Korea, 10-12 June 2015.
401. WHO. 2015. The end TB Strategy: global strategy and targets for tuberculosis prevention, care and control after 2015.
402. WHO. 2015. Antimicrobial Resistance: An Emerging Water, Sanitation and Hygiene Issue. Briefing Note.
403. WHO. 2015. GLOBAL ANTIMICROBIAL RESISTANCE SURVEILLANCE SYSTEM. Infographic.
404. WHO. 2015. Global action plan on antimicrobial resistance.
405. WHO. 2015. Global Antimicrobial Resistance Surveillance System. Manual for Early Implementation.
406. WHO. 2015. GLOBAL TECHNICAL STRATEGY FOR MALARIA 2016–2030.
407. WHO. 2015. Guidelines for surveillance of drug resistance in tuberculosis. 5th edition.
408. WHO. 2015. IMPLEMENTING THE END TB STRATEGY: THE ESSENTIALS.
409. WHO. 2015. INVESTING IN THE DEVELOPMENT OF NEW ANTIBIOTICS AND THEIR CONSERVATION: A PROPOSAL FOR A GLOBAL ANTIBIOTIC RESEARCH AND DEVELOPMENT FACILITY TECHNICAL CONSULTATION JOINTLY HOSTED BY THE WORLD HEALTH ORGANIZATION AND THE DRUGS FOR NEGLECTED DISEASES INITIATIVE. GENEVA, SWITZERLAND, 13 NOVEMBER 2015.
410. WHO. 2015. Antimicrobial resistance Summary report on progress made in implementing resolution WHA67.25 on antimicrobial resistance. Report by the Secretariat A68/19.
411. WHO. 2015. Antimicrobial resistance: Draft global action plan on antimicrobial resistance. Report by the Secretariat A68/20.
412. WHO. 2015. Antimicrobial resistance: Draft global action plan on antimicrobial resistance. CORRIGENDUM. Report by the Secretariat A68/20 Corr1.
413. WHO. 2015. Global vaccine action plan. Report by the Secretariat A68/30.

Didier Wernli, Stephan Harbarth, Nicolas Levrat, Didier Pittet

414. WHO. 2015. Global action plan on antimicrobial resistance: Options, including potential deliverables, for the conduct of a high-level meeting in 2016, in the margins of the United Nations General Assembly. Report by the Secretariat EB138/24.
415. WHO. 2015. Strengthening emergency and essential surgical care and anaesthesia as a component of universal health coverage. Resolution WHA68.15.
416. WHO. 2015. Global technical strategy and targets for malaria 2016–2030. Resolution WHA68.2.
417. WHO. 2015. Global vaccine action plan. Resolution WHA68.6.
418. WHO. 2015. Global action plan on antimicrobial resistance. Resolution WHA68.7.
419. WHO. 2015. Sample terms of reference for a national multisectoral coordinating group, for a national focal point and for a technical working group.
420. WHO. 2015. Strategic and Technical Advisory Group on Antimicrobial Resistance (STAG-AMR). Report of Fourth Meeting. Geneva 24-25 February 2015.
421. WHO. 2015. 5th Meeting of the Strategic and Technical Advisory Group on antimicrobial resistance (STAG - AMR). DRAFT AGENDA 23-24 November 2015.
422. WHO. 2015. Strategic and Technical Advisory Group on antimicrobial resistance (STAG-AMR). Report of Fifth Meeting. Geneva, 23-24 November 2015.
423. WHO. 2015. Strategy for Malaria Elimination in the Greater Mekong Subregion (2015–2030).
424. WHO. 2015. Worldwide country situation analysis: response to antimicrobial resistance.
425. WHO. 2015. Global Action Plan on Antimicrobial Resistance. Presentation by Marc Sprenger at the ECDC 10 year Anniversary Event. Stockholm, 22 September 2015.
426. WHO. 2015. GLOBAL ANTIMICROBIAL RESISTANCE SURVEILLANCE SYSTEM. Technical Meeting on the Early Implementation Phase. Meeting Report. WHO Regional Office for Europe. Copenhagen, Denmark 22-23 October 2015.
427. WHO. 2015. Global Action Plan on Antimicrobial Resistance. Presentation by Marc Sprenger at the Technical Consultation for the Global Antibiotic Research & Development Facility. 13 November 2015.
428. WHO. 2016. MULTIDRUG-RESISTANT TUBERCULOSIS (MDR-TB). Factsheet. 2016 UPDATE
429. WHO. 2016.12. ELIMINATING MALARIA IN THE GREATER MEKONG SUBREGION : UNITED TO END A DEADLY DISEASE.
430. WHO. 2017. Critically Important Antimicrobials for Human Medicine 5th Revision 2016 : Ranking of medically important antimicrobials for risk management of antimicrobial resistance due to non-human use. WHO Advisory Group on Integrated Surveillance of Antimicrobial Resistance. June 2017.
431. WHO. 2016. Consultation of Member States and relevant partners on options for establishing a global development and stewardship framework to combat antimicrobial resistance. Background Paper. Geneva, 29 February 2016.
432. WHO. 2016. Diagnostic stewardship : A guide to implementation in antimicrobial resistance surveillance sites. Global AMR Surveillance System.
433. WHO. 2016. Guide to completing the GLASS implementation questionnaire. Global AMR Surveillance System.
434. WHO. 2016. Guide to enrolment for antimicrobial resistance national focal points. Global AMR Surveillance System.
435. WHO. 2016. Guide to preparing aggregated antimicrobial resistance data files. Global AMR Surveillance System.
436. WHO. 2016. Guide to uploading aggregated antimicrobial resistance data. Global AMR Surveillance System.
437. WHO. 2016. Implementation questionnaire. Global AMR Surveillance System.
438. WHO. 2016. Report of the meeting of the WHO Global Collaborating Centres to support AMR activities globally. Global AMR Surveillance System. Geneva, 13-14 December 2016.
439. WHO. 2016. National AMR surveillance systems. Core components checklist and questionnaire. Global AMR Surveillance System.
440. WHO. 2016. National AMR surveillance systems. A guide to planning, implementation, and monitoring and evaluation. Global AMR Surveillance System.
441. WHO. 2016. Global report on early warning indicators of HIV drug resistance. JULY 2016.
442. WHO. 2016. MIDTERM REVIEW OF THE GLOBAL VACCINE ACTION PLAN. STRATEGIC ADVISORY GROUP OF EXPERTS ON IMMUNIZATION.
443. WHO. 2016. Guidelines on Core Components of Infection Prevention and Control Programmes at the National and Acute Health Care Facility Level.
444. WHO. 2016. Minutes of the Technical Expert Group on Drug Efficacy and Response. Geneva, Switzerland, 10–11 December 2015.
445. WHO. 2016. Global action plan on antimicrobial resistance Options for establishing a global development and stewardship framework to support the development, control, distribution and appropriate use of new antimicrobial medicines, diagnostic tools, vaccines and other interventions Report by the Secretariat A69/24 Add1.

Didier Wernli, Stephan Harbarth, Nicolas Levrat, Didier Pittet

446. WHO. 2016. Antimicrobial resistance. Report by the Secretariat EB140/11.
447. WHO. 2016. Health in the 2030 Agenda for Sustainable Development. Resolution WHA69.11.
448. WHO. 2016. Follow-up of the report of the Consultative Expert Working Group on Research and Development: Financing and Coordination. Resolution WHA69.23.
449. WHO. 2016. Addressing the global shortage of medicines and vaccines. Resolution WHA69.25.
450. WHO. 2016. National action plan on antimicrobial resistance. SAMPLE TEMPLATE.
451. WHO. 2016. Sample conceptual monitoring and evaluation framework for national action plans on antimicrobial resistance.
452. WHO. 2016. Strategic and Technical Advisory Group on antimicrobial resistance (STAG-AMR). Report of sixth meeting. 11 May 2016.
453. WHO. 2016. GLOBAL HEALTH SECTOR STRATEGY ON SEXUALLY TRANSMITTED INFECTIONS 2016–2021 TOWARDS ENDING STIs
454. WHO. 2016. Annex 8 Collaborative procedure between the World Health Organization (WHO) Prequalification Team and national regulatory authorities in the assessment and accelerated national registration of WHO-prequalified pharmaceutical products and vaccines. WHO Expert Committee on Specifications for Pharmaceutical Preparations. Fiftieth report.
455. WHO. 2016. Annex 10 WHO general guidance on variations to multisource pharmaceutical products. WHO Expert Committee on Specifications for Pharmaceutical Preparations. Fiftieth report.
456. WHO. 2016. WHO methodology for a global programme on surveillance of antimicrobial consumption.
457. WHO. 2016. WHO treatment guidelines for drug resistant tuberculosis.
458. WHO. 2016. Minutes of the Evidence Review Group meeting on the emergence and spread of multidrug-resistant *Plasmodium falciparum* lineages in the Greater Mekong subregion. Geneva, Switzerland, 19–20 December 2016.
459. WHO. 2017. ANTIBACTERIAL AGENTS IN CLINICAL DEVELOPMENT. An analysis of the antibacterial clinical development pipeline, including tuberculosis.
460. WHO. 2017. WHO Model List of Essential Medicines 20th List. August 2017.
461. WHO. 2017. Integrated Surveillance of Antimicrobial Resistance in Foodborne Bacteria: Application of a One Health Approach Guidance from the WHO Advisory Group on Integrated Surveillance of Antimicrobial Resistance (AGISAR).
462. WHO. 2017. EXPERT CONSULTATION MEETING ON HEALTH WORKFORCE EDUCATION AND ANTIMICROBIAL RESISTANCE CONTROL 23-24 MARCH 2017, GENEVA.
463. WHO. 2017. Evidence of hand hygiene as the building block for infection prevention and control: An extract from the systematic literature reviews undertaken as the background for the WHO . Guidelines on Core Components of Infection Prevention and Control Programmes at the National and Acute Health Care Facility Level. WHO Global Infection Prevention and Control Unit.
464. WHO. 2017. Global action plan on HIV drug resistance 2017–2021.
465. WHO. 2017. Global framework comments from member states.
466. WHO. 2017. Informal Consultation of Member States and relevant partners on the global development and stewardship framework to combat antimicrobial resistance Executive Board Room, WHO Headquarters, Geneva, Switzerland 9-10 November 2017.
467. WHO. 2017. GLOBAL PRIORITY LIST OF ANTIBIOTIC-RESISTANT BACTERIA TO GUIDE RESEARCH, DISCOVERY, AND DEVELOPMENT OF NEW ANTIBIOTICS.
468. WHO. 2017. WHO Global Surveillance and Monitoring System for substandard and falsified medical products.
469. WHO. 2017. Guidelines for the prevention and control of carbapenem-resistant Enterobacteriaceae, *Acinetobacter baumannii* and *Pseudomonas aeruginosa* in health care facilities.
470. WHO. 2017. Guidelines on the public health response to pretreatment HIV drug resistance. July 2017.
471. WHO. 2017. HIV drug resistance report 2017.
472. WHO. 2017. Monitoring and Evaluation of National Action Plans on AMR: Suggested approaches. Powerpoint presentation. March 2017.
473. WHO. 2017. Antimicrobial resistance Report by the Secretariat A70/12.
474. WHO. 2017. Strengthening immunization to achieve the goals of the global vaccine action plan. Resolution WHA70.14.
475. WHO. 2017. Global vector control response: an integrated approach for the control of vector-borne diseases. Resolution WHA70.16.
476. WHO. 2017. Improving the prevention, diagnosis and clinical management of sepsis. Resolution WHA70.7.
477. WHO. 2017. Strategic and Technical Advisory Group on antimicrobial resistance (STAG-AMR). Report of Seventh Meeting 2-3 November 2016 WHO Headquarters, Geneva.

Didier Wernli, Stephan Harbarth, Nicolas Levrat, Didier Pittet

478. WHO. 2017. Report of the 8th Meeting of the Strategic and Technical Advisory Group on antimicrobial resistance (STAG - AMR). 29 June 2017.
479. WHO. 2017. TACKLING HIV DRUG RESISTANCE: TRENDS, GUIDELINES AND GLOBAL ACTION. POLICY BRIEF. JULY 2017.
480. WHO. 2017. TREATMENT OF TUBERCULOSIS Guidelines for treatment of drug-susceptible tuberculosis and patient care 2017 UPDATE
481. WHO. 2017. WHO Guidelines on use of medically important antimicrobials in food-producing animals.
482. WHO. 2017. WHO Guidelines on use of medically important antimicrobials in food-producing animals. Web Annex A. Evidence base.
483. WHO. 2017. Annex 6 Multisource (generic) pharmaceutical products: guidelines on registration requirements to establish interchangeability. Republication of Multisource (generic) pharmaceutical products: guidelines on registration requirements to establish interchangeability, WHO Technical Report Series, No. 992, Annex 7 with a new Appendix. WHO Expert Committee on Specifications for Pharmaceutical Preparations. Fifty-first report.
484. WHO. 2017. 2nd High Level Technical Meeting on Surveillance of Antimicrobial Resistance for Local and Global Action. Meeting Report. Stockholm, Sweden 27–28 April 2017.
485. WHO. 2017. Global Malaria Programme Technical Expert Group on Drug Efficacy and Response. World Health Organization, Geneva, Switzerland. 1–2 June 2017.
486. WHO. 2017. Meeting on Monitoring of Antimicrobial Resistance: Outcome and Goal Indicators. MEETING REPORT 16 August 2017.
487. WHO. 2018. Report of the 7th Meeting WHO Advisory Group on Integrated Surveillance of Antimicrobial Resistance (AGISAR). Raleigh, USA, 17-20 October 2016.
488. WHO. 2018. WHO COMPETENCY FRAMEWORK FOR HEALTH WORKERS' EDUCATION AND TRAINING ON ANTIMICROBIAL RESISTANCE.
489. WHO. 2018. Global Antimicrobial Resistance Surveillance System (GLASS) Report Early implementation 2016-17.
490. WHO. 2018. Emerging antimicrobial resistance reporting framework. Global Antimicrobial Resistance Surveillance System (GLASS). August 2018
491. WHO. 2018. Emerging antimicrobial resistance reporting: Guide for emerging AMR event sharing. Global Antimicrobial Resistance Surveillance System (GLASS). August 2018.
492. WHO. 2018. Guidelines on sanitation and health.
493. WHO. 2018. MONITORING GLOBAL PROGRESS ON ADDRESSING ANTIMICROBIAL RESISTANCE: Analysis report of the second round of results of AMR country self-assessment survey 2018.
494. WHO. 2018. WHO Methodology for Point Prevalence Survey on Antibiotic Use in Hospitals Version 1.1.
495. WHO. 2018. Addressing the global shortage of, and access to, medicines and vaccines. Report by the Director-General A71/12.
496. WHO. 2018. Collaboration within the United Nations system and with other intergovernmental organizations. Report by the Director-General A71.43.
497. WHO. 2018. Rheumatic fever and rheumatic heart disease. Resolution WHA71.14.
498. WHO. 2018. Preparation for a high-level meeting of the General Assembly on ending tuberculosis. Resolution WHA71.3.
499. WHO. 2018. WHA71.4 Cholera prevention and control.
500. WHO. 2018. Report of Ninth Meeting. Strategic and Technical Advisory Group on antimicrobial resistance (STAG-AMR). Geneva, Switzerland, 26-27 February 2018.
501. WHO. 2018. TACKLING ANTIMICROBIAL RESISTANCE (AMR) TOGETHER. Working Paper 1.0: Multisectoral coordination.
502. WHO. 2018. TACKLING ANTIMICROBIAL RESISTANCE (AMR) TOGETHER Working Paper 5.0: Enhancing the focus on gender and equity.
503. WHO. 2018. WHO treatment guidelines for isoniazidresistant tuberculosis. Supplement to the WHO treatment guidelines for drug-resistant tuberculosis.
504. WHO. 2018. Annex 11 Collaborative procedure in the assessment and accelerated national registration of pharmaceutical products and vaccines approved by stringent regulatory authorities. WHO Expert Committee on Specifications for Pharmaceutical Preparations. Fifty-second report.
505. WHO. 2018. Report of the 2nd meeting of the WHO AMR Surveillance and Quality Assessment Collaborating Centres Network. Global Antimicrobial Resistance and Use Surveillance System (GLASS). Geneva, Switzerland, 12–14 March 2018.
506. WHO. 2018. Global framework for development and stewardship to combat antimicrobial resistance: state of play. Presentation by Peter Beyer. Geneva, Switzerland, 1-2 October 2018.

Didier Wernli, Stephan Harbarth, Nicolas Levrat, Didier Pittet

507. WHO. 2019. Critically Important Antimicrobials for Human Medicine 6th Revision 2018. Ranking of medically important antimicrobials for risk management of antimicrobial resistance due to non-human use. WHO Advisory Group on Integrated Surveillance of Antimicrobial Resistance (AGISAR).
508. WHO. 2019. Antimicrobial stewardship programmes in health-care facilities in low- and middle-income countries: a WHO practical toolkit.
509. WHO. 2019. Antimicrobial resistance. Resolution EB144/11.
510. WHO. 2019. Global Antimicrobial Resistance Surveillance System (GLASS) Early implementation protocol for inclusion of *Candida* spp. August 2019
511. WHO. 2019. Global Antimicrobial Resistance Surveillance System (GLASS) Report Early implementation 2017-18.
512. WHO. 2019. LANDSCAPE OF DIAGNOSTICS AGAINST ANTIBACTERIAL RESISTANCE, GAPS AND PRIORITIES.
513. WHO. 2019. MONITORING AND EVALUATION OF THE GLOBAL ACTION PLAN ON ANTIMICROBIAL RESISTANCE. Framework and recommended indicators. ANNEX 3. Methodology sheets for recommended indicators.
514. WHO. 2019. World Health Organization Model List of Essential Medicines. 21st List 2019.
515. WHO. 2019. Follow-up to the high-level meetings of the United Nations General Assembly on health-related issues Antimicrobial resistance. Report by the Director-General A72/18.
516. WHO. 2019. WHO report on surveillance of antibiotic consumption: 2016-2018 early implementation.
517. WHO. 2019. Antimicrobial resistance. Resolution WHA72.5.
518. WHO. 2019. Global action on patient safety. Resolution WHA72.6.
519. WHO. 2019. Water, sanitation and hygiene in health care facilities. Resolution WHA72.7.
520. WHO. 2019. TARGET PRODUCT PROFILES FOR ANTIBACTERIAL RESISTANCE DIAGNOSTICS. 17 January 2020.
521. WHO. 2019. Turning plan into actions for antimicrobial resistance. Working Paper 2.0: Implementation and coordination.
522. WHO 2019. Annex 5 Guidelines on import procedures for medical products. WHO Expert Committee on Specifications for Pharmaceutical Preparations. Fifty-third report.
523. WHO. 2020. Core competencies for infection prevention and control professionals.
524. WHO. 2020. Global antimicrobial resistance surveillance system (GLASS) report: early implementation 2020.
525. WHO. 2020. GLASS Guidance for national reference laboratories. Global Antimicrobial Resistance and Use Surveillance System (GLASS).
526. WHO. 2020. GLASS Guide for national surveillance systems for monitoring antimicrobial consumption in hospitals. Global Antimicrobial Resistance and Use Surveillance System (GLASS).
527. WHO. 2020. GLASS manual on the management of antimicrobial consumption data. Global Antimicrobial Resistance and Use Surveillance System (GLASS).
528. WHO. 2020. GLASS method for estimating attributable mortality of antimicrobial resistant bloodstream infections. Global Antimicrobial Resistance and Use Surveillance System (GLASS).
529. WHO. 2020. GLASS methodology for surveillance of national antimicrobial consumption. Global Antimicrobial Resistance and Use Surveillance System (GLASS).
530. WHO. 2020. GLASS whole-genome sequencing for surveillance of antimicrobial resistance. Global Antimicrobial Resistance and Use Surveillance System (GLASS).
531. WHO. 2020. INTRODUCTION (EXECUTIVE SUMMARY) TO THE REFERENCE PAPER ON MODELS TO INFORM THE DEVELOPMENT OF TERMS OF REFERENCE OF THE INDEPENDENT PANEL ON EVIDENCE FOR ACTION AGAINST AMR. February 2020.
532. WHO. 2020. ANNEX I. REFERENCE PAPER ON MODELS TO INFORM THE DEVELOPMENT OF TERMS OF REFERENCE OF THE INDEPENDANT PANEL ON EVIDENCE FOR ACTION AGAINST AMR February 2020.
533. WHO. 2020. Annex 6 Points to consider for manufacturers and inspectors: environmental aspects of manufacturing for the prevention of antimicrobial resistance. WHO Expert Committee on Specifications for Pharmaceutical Preparations. Fifty-fourth report.
534. WHO. 2020. First meeting of the WHO Antifungal Expert Group on Identifying Priority Fungal Pathogens. Meeting report.
535. WHO. 2020. Annex 7 Good storage and distribution practices for medical products. WHO Expert Committee on Specifications for Pharmaceutical Preparations. Fifty-fourth report.
536. WHO. 2021. Resource materials for in-country development and implementation of national action plans to address antimicrobial resistance. September 2021.
537. WHO. 2021. Antibacterial agents in clinical and preclinical development: an overview and analysis.

Didier Wernli, Stephan Harbarth, Nicolas Levrat, Didier Pittet

538. WHO. 2021. Global antimicrobial resistance and use surveillance system (GLASS) report 2021. Global Antimicrobial Resistance and Use Surveillance System (GLASS).
539. WHO. 2021. GLASS the detection and reporting of colistin resistance, second edition. Global Antimicrobial Resistance and Use Surveillance System (GLASS).
540. WHO. 2021. Laboratory-based survey of acquired HIV drug resistance using remnant viral load specimens.
541. WHO. 2021. WHO Strategic and Technical Advisory Group for Antimicrobial Resistance (STAG-AMR): report of the first meeting, 22-24 June 2021.
542. WHO. 2021. WHO costing and budgeting tool for national action plans on antimicrobial resistance: user guide.
543. WHO. 2021. WHO integrated global surveillance on ESBL-producing *E. coli* using a “One Health” approach: implementation and opportunities.
544. WHO. 2021. WHO policy guidance on integrated antimicrobial stewardship activities.
545. WHO. 2021. World Health Organization Model List of Essential Medicines for Children – 8th List, 2021.
546. WHO. 2022. Burkina Faso national action plan on antimicrobial resistance: review of progress in the human health sector. Antimicrobial resistance policy information and action brief series.
547. WHO. 2022. WHO implementation handbook for national action plans on antimicrobial resistance: guidance for the human health sector.
548. WHO OIE FAO. 2018. Global Framework for Development & Stewardship to Combat Antimicrobial Resistance Draft.
549. WHO. 2016. IMPLEMENTATION OF THE GLOBAL ACTION PLAN ON ANTIMICROBIAL RESISTANCE. WHO GAP AMR Newsletter UNGA Special Issue September 22 2016.
550. WHO OIE WB. 2014. WHO-OIE Operational Framework for Good governance at the human-animal interface: Bridging WHO and OIE tools for the assessment of national capacities.
551. WHO UNICEF. 2014. WASH Post-2015. Proposed indicators for drinking water, sanitation and hygiene
552. WHO UNICEF. 2016. TACKLING ANTIMICROBIAL RESISTANCE: Supporting national measures to address infection prevention and control and water, sanitation and hygiene in health care settings.
553. WIPO WHO WTO. 2016. Antimicrobial resistance – a global epidemic. Background paper for the Technical Symposium on Antimicrobial Resistance: How to Foster Innovation, Access and Appropriate Use of Antibiotics?
554. WIPO WHO WTO. 2016. Antimicrobial Resistance: How to Foster Innovation, Access and Appropriate Use of Antibiotics? A Joint Technical Symposium by the World Health Organization (WHO), the World Intellectual Property Organization (WIPO) and the World Trade Organization (WTO) Geneva, October 25, 2016.
555. WIPO. 2015. Promoting Medical Innovation and Access, Together. Global Challenges Brief on Trilateral Cooperation.
556. WIPO. 2015. Sharing Innovation and Building Capacity to Fight Neglected Tropical Diseases: A Selection of WIPO Research Fellowship Stories. Global Challenges Report.
557. WIPO. 2016. Public Health, Intellectual Property, and TRIPS at 20: Innovation and Access to Medicines; Learning from the Past, Illuminating the Future. Briefing Series on Trilateral Cooperation.
558. WIPO. 2017. Antimicrobial Resistance (AMR) and Multidrug Resistance (MDR): Overview of current approaches, consortia and intellectual property issues.
559. WIPO. 2017. Vaccines: Accelerating Innovation and Access.
560. World Bank. 2016. DRUG-RESISTANT INFECTIONS: A Threat to Our Economic Future. Discussion Draft. September 2016.
561. World Bank. 2017. Assessing the Global Economic and Poverty Effects of Antimicrobial Resistance. Policy Research Working Paper 8133.
562. World Bank. 2017. Final Report DRUG-RESISTANT INFECTIONS A Threat to Our Economic Future March 2017.
563. World Bank. 2018. One Health : Operational Framework for Strengthening Human, Animal, and Environmental Public Health Systems at their Interface.
564. World Bank. 2019. Pulling Together to Beat Superbugs Knowledge and Implementation Gaps in Addressing Antimicrobial Resistance.
565. WTO WIPO WHO. 2012. Promoting Access to Medical Technologies and Innovation. Intersections between public health, intellectual property and trade.
566. WTO. 2007. Relationship with CODEX, IPPC AND OIE. Note by the Secretariat. Committee on Sanitary and Phytosanitary Measures.

Didier Wernli, Stephan Harbarth, Nicolas Levrat, Didier Pittet

**Supplementary material 4 – Overview of the results regarding the main recent activities of the United Nations and related organizations on antimicrobial resistance**

| N                                                         | Acronym     | Primary mandate          | AMR specific activities | AMR sensitive activities | Mandate in relation to AMR | Type of organization                            | Summary of current role in the governance of AMR covering both AMR sensitive and AMR specific activities                                                                                                                                                                                                                                                                                                                            |
|-----------------------------------------------------------|-------------|--------------------------|-------------------------|--------------------------|----------------------------|-------------------------------------------------|-------------------------------------------------------------------------------------------------------------------------------------------------------------------------------------------------------------------------------------------------------------------------------------------------------------------------------------------------------------------------------------------------------------------------------------|
| <b>Mandate in relation to AMR: Core organizations</b>     |             |                          |                         |                          |                            |                                                 |                                                                                                                                                                                                                                                                                                                                                                                                                                     |
| 1                                                         | FAO         | Food and agriculture     | Yes                     | Yes                      | Core                       | Specialized agencies                            | The Food and Agriculture Organization of the United Nations sets standards for foodborne AMR through the CAC and provide guidance to countries on AMR surveillance, specifically by promoting environmental surveillance as an indicator of AMR.                                                                                                                                                                                    |
| 2                                                         | OIE         | Animal Health            | Yes                     | Yes                      | Core                       | Independent                                     | The World Organisation for Animal Health is responsible for improving animal health worldwide. OIE has a central role in AMR in different global policies such as infection prevention and control, containment, surveillance, and conservation of antimicrobial effectiveness. OIE synthesis scientific knowledge on AMR and adopts non-binding resolutions and technical standards AMR. It has developed its own strategy on AMR. |
| 3                                                         | UNAIDS      | Health                   | Yes                     | Yes                      | Core                       | Other bodies (ECOSOC)                           | The Joint United Nations Programme on HIV/AIDS focuses on AMR in HIV. It has identified AMR as a major threat to AIDS responses. UNAIDS has implemented targeted AMR programmes at the country level.                                                                                                                                                                                                                               |
| 4                                                         | WHO         | Health                   | Yes                     | Yes                      | Core                       | Specialized agencies                            | As the international coordinating agency for health, the World Health Organization is involved in all AMR-related objectives/functions.                                                                                                                                                                                                                                                                                             |
| <b>Mandate in relation to AMR: Involved organizations</b> |             |                          |                         |                          |                            |                                                 |                                                                                                                                                                                                                                                                                                                                                                                                                                     |
| 1                                                         | EOSG        | Management               | Yes                     | No                       | Involved                   | Departments and Offices (Secretariat)           | The Executive Office of the Secretary-General was co-chair of the AMR-IACG and was involved in collaboration with the Tripartite with the production of the final report to the Secretary General of the United Nations.                                                                                                                                                                                                            |
| 2                                                         | IFAD        | Agricultural development | Yes                     | Yes                      | Involved                   | Specialized Agencies                            | The International Fund for Agricultural Development has worked on specific AMR issues related to agriculture, such as the use of antibiotics in animals and environmental contamination.                                                                                                                                                                                                                                            |
| 3                                                         | IOM         | Migration                | Yes                     | Yes                      | Involved                   | Related Organizations (UNGA + Security Council) | The International Organization for Migration runs health programmes on TB and malaria including some AMR specific activities in several countries.                                                                                                                                                                                                                                                                                  |
| 4                                                         | ITU         | Telecommunication        | Yes                     | Yes                      | Involved                   | Specialized Agencies                            | The International Telecommunication Union had a shared focus group with WHO on artificial intelligence for health that uses AI for the diagnostic of bacterial infection and AMR.                                                                                                                                                                                                                                                   |
| 5                                                         | Secretariat | Coordination             | Yes                     | Yes                      | Involved                   | UN Principal Organs                             | The Secretariat facilitates coordination related to the adoption of the Political Declaration on AMR in 2016.                                                                                                                                                                                                                                                                                                                       |
| 6                                                         | UNCTAD      | Trade                    | Yes                     | Yes                      | Involved                   | Other entities (UNGA + ECOSOC)                  | The United Nations Conference on Trade and Development works to ensure access to existing antimicrobial treatments, but also to provide standards and recommendations on drugs on the market.                                                                                                                                                                                                                                       |
| 7                                                         | UNDP        | Social development       | Yes                     | Yes                      | Involved                   | Funds and programmes (UNGA + ECOSOC)            | The United Nations Development Programme is working in several AMR sensitive and specific activities in diseases such as TB, malaria, and HIV-AIDS.                                                                                                                                                                                                                                                                                 |
| 8                                                         | UNEP        | Environment              | Yes                     | Yes                      | Involved                   | Funds and programmes (UNGA + ECOSOC)            | The United Nations Environment Programme was part of the IACG-AMR. In 2018, it adopted resolution UNEP/EA.3/Res.4 on health and the environment which has a specific section on AMR.                                                                                                                                                                                                                                                |
| 9                                                         | UNFPA       | Health                   | Yes                     | Yes                      | Involved                   | Funds and programmes (UNGA + ECOSOC)            | The United Nations Population Fund is active on AMR through the prevention of HIV infection, access to medicine, and conservation of antimicrobial effectiveness for HIV and TB.                                                                                                                                                                                                                                                    |

Didier Wernli, Stephan Harbarth, Nicolas Levrat, Didier Pittet

|                                                          |            |                    |     |     |          |                                                 |                                                                                                                                                                                                                                                                                                                                                                                                                                                                                        |
|----------------------------------------------------------|------------|--------------------|-----|-----|----------|-------------------------------------------------|----------------------------------------------------------------------------------------------------------------------------------------------------------------------------------------------------------------------------------------------------------------------------------------------------------------------------------------------------------------------------------------------------------------------------------------------------------------------------------------|
| 10                                                       | UNGA       | Oversight          | Yes | Yes | Involved | UN Principal Organs                             | The United Nations General Assembly has adopted the Political Declaration on AMR in 2016. It also adopted several AMR sensitive resolutions related to health including specific diseases.                                                                                                                                                                                                                                                                                             |
| 11                                                       | UNHCR      | Refugees           | Yes | Yes | Involved | Other entities (UNGA + ECOSOC)                  | As part of its mandate on refugees' health, the United Nations High Commissioner for Refugees has both AMR specific and sensitive activities on infection prevention, access to medicines and conservation of antimicrobial effectiveness.                                                                                                                                                                                                                                             |
| 12                                                       | UNICEF     | Children           | Yes | Yes | Involved | Funds and programmes (UNGA + ECOSOC)            | As part of its mandate on child health, the United Nations International Children's Emergency Fund has activities on <b>infection prevention, access to medicines and conservation</b> of antimicrobial effectiveness. UNICEF was a member of IACG-AMR and issued a technical note on AMR in 2019. <sup>69</sup>                                                                                                                                                                       |
| 13                                                       | UNRWA      | Refugees           | Yes | Yes | Involved | Other entities (UNGA + ECOSOC)                  | The United Nations Relief and Works Agency has AMR-sensitive and -specific activities in refugee camps across several countries in the Middle East to foster <b>surveillance of AMR and conservation</b> of antimicrobial effectiveness                                                                                                                                                                                                                                                |
| 14                                                       | WFP        | Food               | Yes | Yes | Involved | Funds and programmes (UNGA + ECOSOC)            | The World Food Programme has several AMR sensitive activities related to food and has initiated a dialogue with FAO's AMR Unit.                                                                                                                                                                                                                                                                                                                                                        |
| 15                                                       | WIPO       | Innovation         | Yes | Yes | Involved | Specialized Agencies                            | The World Intellectual Property Organization was a member of the IACG-AMR and is part of the Tripartite collaboration on public health, properties, and trade. It held a joint technical symposium with WTO and WHO on how to foster innovation, access, and appropriate use of antibiotics in 2016.                                                                                                                                                                                   |
| 16                                                       | World Bank | Finance            | Yes | Yes | Involved | Specialized Agencies                            | The 5 <sup>th</sup> objective of the 2015 WHO GAP AMR contains several recommendations regarding collaboration with the World Bank in areas such as quantification of investment needed to implement national action plans, economic impact of AMR, and the wider estimate regarding the costs of inaction. <sup>2 8</sup><br>The World Bank has published several evaluations about AMR interventions including a comprehensive One Health framework for public health interventions. |
| 17                                                       | WTO        | Trade              | Yes | Yes | Involved | Related Organizations (UNGA + Security Council) | Through its mandate on sanitary and phytosanitary measures (SPS agreement) associated with trade, the World Trade Organization has an influence on the <b>containment</b> of AMR. TRIPS agreement is the main multilateral instrument on <b>innovation and access</b> to health technologies.                                                                                                                                                                                          |
| <b>Mandate in relation to AMR: Related organizations</b> |            |                    |     |     |          |                                                 |                                                                                                                                                                                                                                                                                                                                                                                                                                                                                        |
| 1                                                        | HRC        | Human rights       | No  | Yes | Related  | Subsidiary Organs (UNGA)                        | The Human Rights Council adopts norms regarding <b>access</b> to medicines that are relevant to AMR.                                                                                                                                                                                                                                                                                                                                                                                   |
| 2                                                        | IAEA       | Security           | No  | Yes | Related  | Related Organizations (UNGA + Security Council) | The International Atomic Energy Agency collaborated with FAO to develop an isotopic analytical toolbox that provides information on the movements of antibiotics through soil and water.                                                                                                                                                                                                                                                                                               |
| 3                                                        | ICAO       | Air transport      | No  | Yes | Related  | Specialized Agencies                            | The International Civil Aviation Organization has AMR-sensitive containment activities regarding the transmission of infectious diseases in aviation in collaboration with the WHO.                                                                                                                                                                                                                                                                                                    |
| 4                                                        | ILO        | Labour             | No  | Yes | Related  | Specialized Agencies                            | The International Labour Organization has a long track record of <b>infection prevention</b> and control activities on <b>health and safety at work</b> .                                                                                                                                                                                                                                                                                                                              |
| 5                                                        | IMO        | Maritime transport | No  | Yes | Related  | Specialized Agencies                            | Some activities of International Maritime Organization to minimize the transfer of pathogen in ballast water can be related to the containment of AMR.                                                                                                                                                                                                                                                                                                                                 |
| 6                                                        | OCHA       | Humanitarian       | No  | Yes | Related  | Departments and Offices (Secretariat)           | The United Nations Office for the Coordination of Humanitarian Affairs has identified the prevention and control of infectious diseases as an important topic in humanitarian crisis.                                                                                                                                                                                                                                                                                                  |



Didier Wernli, Stephan Harbarth, Nicolas Levrat, Didier Pittet

|                                                           |            |                                 |    |     |          |                                       |                                                                                                                                                                                                                         |
|-----------------------------------------------------------|------------|---------------------------------|----|-----|----------|---------------------------------------|-------------------------------------------------------------------------------------------------------------------------------------------------------------------------------------------------------------------------|
| 7                                                         | OHCHR      | Human rights                    | No | Yes | Related  | Departments and Offices (Secretariat) | The Office of the High Commissioner for Human Rights conducts normative work on the issue of access to medicines including HIV/AIDS and the right to health.                                                            |
| 8                                                         | UN Women   | Women                           | No | Yes | Related  | Other entities (UNGA + ECOSOC)        | The United Nations Entity for Gender and the Empowerment of Women has various AMR-sensitive activities linked to infection prevention in maternal health in LMIC                                                        |
| 9                                                         | UN-Habitat | Urban                           | No | Yes | Related  | Funds and programmes (UNGA + ECOSOC)  | The United Nations Human Settlements Programme works in infection prevention in areas such as water, sanitation, and urban health.                                                                                      |
| 10                                                        | UNICRI     | Crime                           | No | Yes | Related  | Research and training (ECOSOC)        | The United Nations Interregional Crime and Justice Research Institute's activities to reduce counterfeit drugs can be considered as AMR-sensitive activities regarding the conservation of antimicrobial effectiveness. |
| 11                                                        | UNIDO      | Development                     | No | Yes | Related  | Specialized Agencies                  | The United Nations Industrial Development Organization has AMR sensitive activities related to <b>infection prevention, innovation, and access</b> to medicines.                                                        |
| 12                                                        | UNISDR     | Disaster                        | No | Yes | Related  | Departments and Offices (Secretariat) | The United Nations International Strategy for Disaster Reduction has AMR-sensitive activities related to its work on <b>infection prevention</b> .                                                                      |
| 13                                                        | UNODC      | Crime                           | No | Yes | Related  | Departments and Offices (Secretariat) | The United Nations Office on Drugs and Crime has AMR-sensitive activities related conservation with its work to reduce counterfeit drugs.                                                                               |
| 14                                                        | UNOPS      | Operations                      | No | Yes | Related  | Other entities (UNGA + ECOSOC)        | The United Nations Office for Project Services has been involved in the procurement of quality drugs in LMIC, which relates to conservation.                                                                            |
| 15                                                        | UNRISD     | Development                     | No | Yes | Related  | Research and training (ECOSOC)        | The United Nations Research Institute for Social Development has done research and policy analysis related to the prevention of infection.                                                                              |
| 16                                                        | UNU        | Education                       | No | Yes | Related  | Research and training (UNGA + ECOSOC) | The United Nations University has created an International Institute for Global Health which covers issues related to infection prevention.                                                                             |
| <b>Mandate in relation to AMR: Relevant organizations</b> |            |                                 |    |     |          |                                       |                                                                                                                                                                                                                         |
| 1                                                         | CEB        | Coordination                    | No | No  | Relevant | Interorganizational collaboration     | The coordination mandate of Chief Executive Board is related to the intersectoral nature of AMR.                                                                                                                        |
| 2                                                         | DESA       | Economic/social                 | No | No  | Relevant | Departments and Offices (Secretariat) | The United Nations Department of Economic and Social Affairs promotes the implementation of the 2030 Agenda for Sustainable Development and support the follow up and reviews of the SDG.                               |
| 3                                                         | ECOSOC     | Economic and social development | No | No  | Relevant | UN Principal Organs                   | The United Nations Economic and Social Council has multiples activities regarding global health, sustainable development, migration, social inclusion.                                                                  |
| 4                                                         | HLPF       | Sustainable Development         | No | No  | Relevant | Other (UNGA + ECOSOC)                 | The High-level Political Forum has a broad mandate on sustainable development.                                                                                                                                          |
| 5                                                         | IMF        | Finance                         | No | No  | Relevant | Specialized Agencies                  | The International Monetary Fund has an expertise in the evaluation of risks.                                                                                                                                            |
| 6                                                         | ITC        | Trade                           | No | No  | Relevant | Other entities (UNGA + ECOSOC)        | The work of the International Trade Centre on trade and food safety and on medical tourism intersect with AMR.                                                                                                          |
| 7                                                         | UNESCO     | Education                       | No | No  | Relevant | Specialized Agencies                  | The United Nations United Educational, Scientific and Cultural Organization was mentioned in the WHO GAP AMR in 2015.                                                                                                   |
| 8                                                         | UNITAR     | Training                        | No | No  | Relevant | Research and training (ECOSOC)        | The United Nations Institute for Training and Research has organized training activities on health                                                                                                                      |
| 9                                                         | UNOG       | Coordination                    | No | No  | Relevant | Departments and Offices (Secretariat) | The broad coordination mandate of the United Nations Office at Geneva is relevant for the coordination of AMR.                                                                                                          |
| 10                                                        | UNON       | Coordination                    | No | No  | Relevant | Departments and Offices (Secretariat) | The broad coordination mandate of the United Nations Office at Nairobi is relevant for the coordination of AMR.                                                                                                         |

Didier Wernli, Stephan Harbarth, Nicolas Levrat, Didier Pittet

|                                                          |       |                       |    |    |          |                                                 |                                                                                                                                                                                    |
|----------------------------------------------------------|-------|-----------------------|----|----|----------|-------------------------------------------------|------------------------------------------------------------------------------------------------------------------------------------------------------------------------------------|
| 11                                                       | UNOP  | Partnership           | No | No | Relevant | Departments and Offices (Secretariat)           | The United Nations Office for Partnership is relevant for AMR by supporting the implementation of activities by different partners.                                                |
| 12                                                       | UNOV  | Regional Office       | No | No | Relevant | Departments and Offices (Secretariat)           | The United Nations Office at Vienna is relevant for AMR by working closely with the UNODC.                                                                                         |
| 13                                                       | UNSC  | Security              | No | No | Relevant | UN Principal Organs                             | The United Nations Security Council has adopted two resolutions on HIV-AIDS in 2000 and 2011.                                                                                      |
| 14                                                       | UNSSC | Training              | No | No | Relevant | Research and training (ECOSOC)                  | The United Nations System Staff College provides education and awareness on health issues.                                                                                         |
| 15                                                       | UNWTO | Tourism               | No | No | Relevant | Specialized Agencies                            | Some health-related activities such as those on medical tourism are relevant to AMR.                                                                                               |
| <b>Mandate in relation to AMR: Distant organizations</b> |       |                       |    |    |          |                                                 |                                                                                                                                                                                    |
| 1                                                        | CTBTO | Security              | No | No | Distant  | Related Organizations (UNGA + Security Council) | The Preparatory Commission for the Comprehensive Nuclear-Test-Ban Treaty Organization's role is to detect and ban any atomic explosion on the planet.                              |
| 2                                                        | DGC   | Internal management   | No | No | Distant  | Departments and Offices (Secretariat)           | The Department for General Assembly and Conference Management plans and coordinates conferences and meetings in close consultation with the Secretariat and all relevant bodies.   |
| 3                                                        | DMSPC | Internal Management   | No | No | Distant  | Departments and Offices (Secretariat)           | The Department of Management Strategy, Policy and Compliance has a policy, strategy and compliance role on management issues.                                                      |
| 4                                                        | DOS   | Internal Management   | No | No | Distant  | Departments and Offices (Secretariat)           | The Department of Operational Support focuses on operations, services, transactions and support to entities in weak environments.                                                  |
| 5                                                        | DPO   | Security              | No | No | Distant  | Departments and Offices (Secretariat)           | The Department of Peacekeeping Operations provides political and executive direction to United Nations peacekeeping operations worldwide.                                          |
| 6                                                        | DPPA  | Security              | No | No | Distant  | Departments and Offices (Secretariat)           | The Department of Political and Peacebuilding Affairs plays a central role in United Nations efforts to prevent and resolve deadly conflict around the world.                      |
| 7                                                        | DSS   | Security              | No | No | Distant  | Departments and Offices (Secretariat)           | The Department of Safety and Security's mission is to strengthen, coordinate and standardize the security management system for all United Nations agencies.                       |
| 8                                                        | ICC   | International justice | No | No | Distant  | Related Organizations (UNGA + Security Council) | The International Criminal Court is responsible for trying persons accused of genocide, crimes against humanity, crimes of aggression and war crimes.                              |
| 9                                                        | ICJ   | International justice | No | No | Distant  | UN Principal Organs                             | The International Court of Justice's main functions are to settle legal disputes submitted by States and to give an opinion on legal questions submitted.                          |
| 10                                                       | ISA   | Marine                | No | No | Distant  | Related Organizations (UNGA + Security Council) | The mission of the International Seabed Authority is to ensure effective protection of the marine environment from the adverse effects that may result from deep-sea activities.   |
| 11                                                       | ITLOS | Marine                | No | No | Distant  | Related Organizations (UNGA + Security Council) | The International Tribunal for the Law of the Sea has jurisdiction over any dispute concerning the interpretation or application of the Convention.                                |
| 12                                                       | JIU   | Oversight             | No | No | Distant  | Subsidiary Organs                               | The Joint Inspection Unit's mandate is to conduct evaluations, inspections, and investigations within the UN system.                                                               |
| 13                                                       | ODA   | Security              | No | No | Distant  | Departments and Offices (Secretariat)           | The Office for Disarmament Affairs supports multilateral efforts aimed at achieving the goal of general and complete disarmament under strict and effective international control. |
| 14                                                       | OIOS  | Oversight             | No | No | Distant  | Departments and Offices (Secretariat)           | The Office of Internal Oversight Services is a United Nations body established to conduct internal audits of the United Nations.                                                   |
| 15                                                       | OLA   | Legal                 | No | No | Distant  | Departments and Offices (Secretariat)           | The Office of Legal Affairs performs the Secretary-General's depositary functions for over 560 multilateral treaties.                                                              |

Didier Wernli, Stephan Harbarth, Nicolas Levrat, Didier Pittet

|    |            |                      |    |    |         |                                                 |                                                                                                                                                                                                                                                                                                                                           |
|----|------------|----------------------|----|----|---------|-------------------------------------------------|-------------------------------------------------------------------------------------------------------------------------------------------------------------------------------------------------------------------------------------------------------------------------------------------------------------------------------------------|
| 16 | OPCW       | Security             | No | No | Distant | Related Organizations (UNGA + Security Council) | The Organization for the Prohibition of Chemical Weapons ensures the proper implementation of the Chemical Weapons Convention by the signatory Member States.                                                                                                                                                                             |
| 17 | OSAA       | Africa               | No | No | Distant | Departments and Offices (Secretariat)           | The Office of the Special Adviser on Africa promotes effective implementation of the 2030 SDG Agenda and enhances international support for Africa's development and security.                                                                                                                                                            |
| 18 | PBC        | Peace                | No | No | Distant | Other (UNGA + Security Council)                 | The United Nations Peacebuilding Commission supports peace efforts in conflict affected countries and is a key addition to the capacity of the International Community in the broad peace agenda.                                                                                                                                         |
| 19 | SRSR/CAAC  | Children in conflict | No | No | Distant | Departments and Offices (Secretariat)           | The Office of the Special Representative of the Secretary-General for Children and Armed Conflict strengthen the protection of children affected by armed conflict, raise awareness, promote the collection of information about the plight of children affected by war and foster international cooperation to improve their protection. |
| 20 | SRSR/SVC   | Sexual violence      | No | No | Distant | Departments and Offices (Secretariat)           | The Office of the Special Representative of the Secretary-General on Sexual Violence in Conflict is responsible for serving as the United Nation's spokesperson and political advocate on conflict-related sexual violence.                                                                                                               |
| 21 | SRSR/VAC   | Children             | No | No | Distant | Departments and Offices (Secretariat)           | The Office of the Special Representative of the Secretary-General on Violence Against Children is a global independent advocate to promote the prevention and elimination of all forms of violence against children.                                                                                                                      |
| 22 | UN-OHRILLS | Development          | No | No | Distant | Departments and Offices (Secretariat)           | The United Nations Office of the High Representative for the Least Developed Countries, Landlocked Developing Countries and Small Island Developing States supports groups of vulnerable countries in the United Nations System.                                                                                                          |
| 23 | UNEGN      | Geographical name    | No | No | Distant | Other Bodies (ECOSOC)                           | The United Nations Group of Experts on Geographical Names objectives are to address the problems of standardization of global geographical names and to submit suggestions and recommendations for standardization.                                                                                                                       |
| 24 | UNIDIR     | Security             | No | No | Distant | Research and training (UNGA + ECOSOC)           | The United Nations Institute for Disarmament Research generates knowledge and promotes dialogue and action on disarmament and security.                                                                                                                                                                                                   |
| 25 | UPU        | Postal service       | No | No | Distant | Specialized Agencies                            | The Universal Postal Union is a United Nations specialized agency and the postal sector's primary forum for international cooperation.                                                                                                                                                                                                    |
| 26 | WMO        | Climate              | No | No | Distant | Specialized Agencies                            | The World Meteorological Organization is involved in international cooperation and coordination concerning the state and behaviour of the Earth's atmosphere, land and oceans, the weather and climate, and the resulting distribution of water resources.                                                                                |

Abbreviations used in the table: AI: Artificial Intelligence, AMR: Antimicrobial Resistance, CAC: Codex Alimentarius Commission, ECOSOC: United Nations Economic and Social Council, GAP: Global Action Plan, HIV/AIDS: Human immunodeficiency virus infection and acquired immunodeficiency syndrome, IACG: Interagency Coordination Group, LMIC: Low- and Middle-Income Countries, NCDS: Non-Communicable Diseases, SDG: Sustainable Development Goals, TB: Tuberculosis, TRIPS: Trade-Related Aspects of Intellectual Property Rights, UN: United Nations, UNGA: United Nations General Assembly.
